# Supplementary material
Source: Royal Society of Chemistry journal article supplement (doi:10.1039/d6cp00180g)
Supplement: d6cp00180g1.pdf [file d6cp00180g1.pdf]

## SUPPORTING INFORMATION

for

### **Stabilising High-Spin, High-Valent Transition-Metal–Oxo Species in Cucurbit[5]uril: Correlating Structure, Spin State, and Reactivity**

Thakur Rochak Kumar Rana<sup>a</sup>, Manjeet Kumar<sup>a</sup>, Mahesh Sundararajan<sup>\*b,c</sup>, and Gopalan  
Rajaraman<sup>\*a</sup>

<sup>a</sup>Department of Chemistry, Indian Institute of Technology Bombay, Powai, Mumbai-400076, India.

**Email:** [rajaraman@chem.iitb.ac.in](mailto:rajaraman@chem.iitb.ac.in)

<sup>b</sup>Chemistry Division, Bhabha Atomic Research Centre, Mumba-400085, India.

<sup>c</sup>Homi Bhabha National Institute, Anushaktinagar, Mumbai – 400 094 India.

**Email:** [smahesh@barc.gov.in](mailto:smahesh@barc.gov.in)

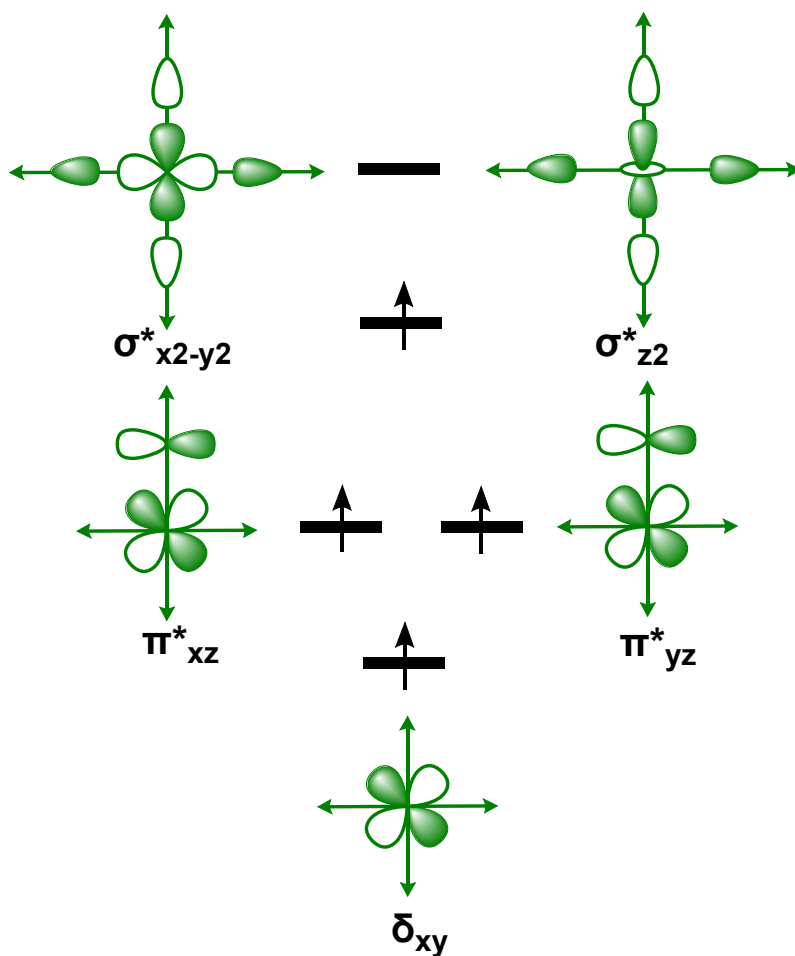

**Figure S1:** Qualitative molecular orbital (MO) diagram for a high-spin Iron(IV)=O species, a ChemDraw representation illustrating the key orbital interactions.

#### Architecture of Formation of $[(CB[5])M^{IV/V}=O(H_2O)]^{2/3+}$ ( $M = Mn, Fe, Co$ )

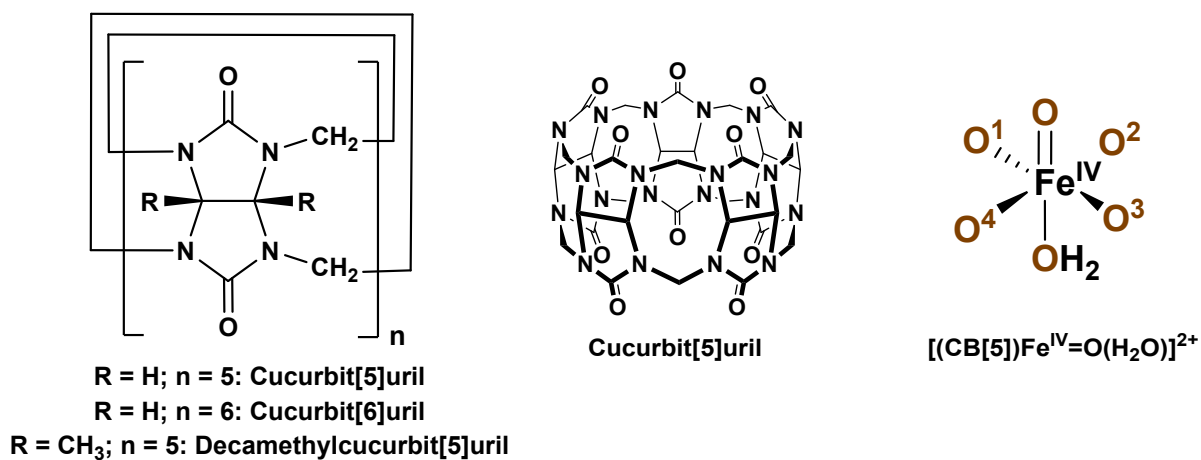

**Figure S2:** Schematic illustration of ligand–macromolecule assembly leading to high-valent metal–oxo complex formation.

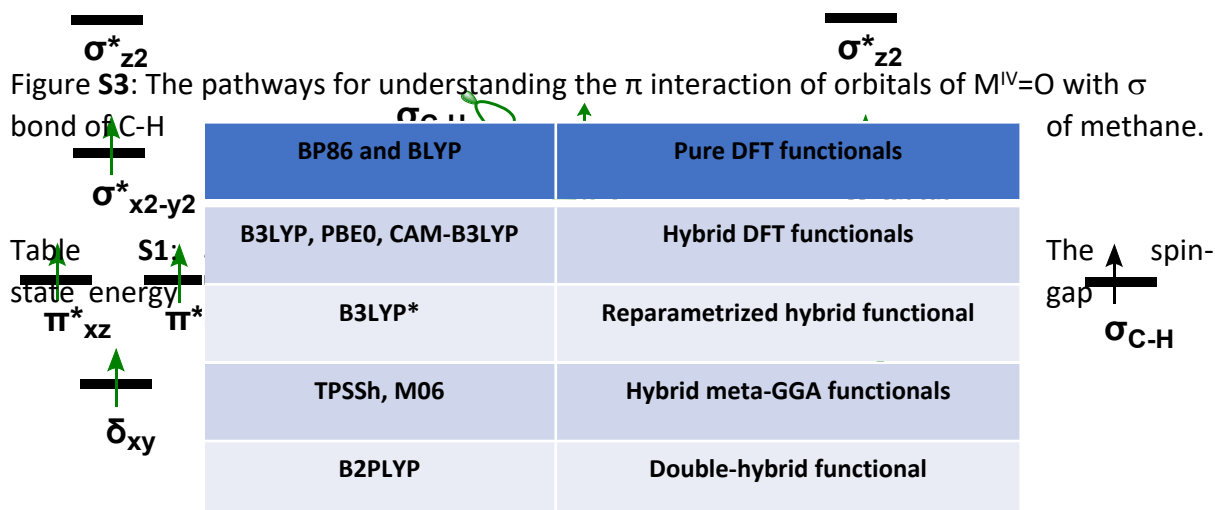

benchmarking to evaluate **DFT functional performance** against **high-level ab initio (DLPNO-CCSD(T))** as reference data  $[(CB[5])M^{IV/V}=O(H_2O)]^{+2/+3}$ , (M = Mn, Fe, and Co; CB[5] = Cucurbit[5]uril). Note all are energy gap in kJ/mol. \*The values in parentheses are next gap.

Table S2: Various type of functional used in benchmarking of complexes against DLPNO-CCSD(T).

| Complexes/Functionals | Mn <sup>IV</sup> =O | Mn <sup>V</sup> =O | Fe <sup>IV</sup> =O* | Fe <sup>V</sup> =O | Co <sup>IV</sup> =O* |
|-----------------------|---------------------|--------------------|----------------------|--------------------|----------------------|
| DLPNO-CCSD            | 87.2                | 130.7              | 122 (258)            | 60.2               | 96.2                 |
| BP86                  | 55.6                | 64.2               | 60.8 (95.9)          | 54.8               | 70.3                 |
| BLYP                  | 57.4                | 47.4               | 63.4 (99.3)          | 56.8               | 59.4                 |
| OLYP                  | 86.4                | 94.0               | 84.8                 | 110.2              | 90.3                 |
| B3LYP                 | 97.9                | 110.8              | 90.3 (216)           | -5.7               | 102.9                |
| CAM-B3LYP             | 19.4                | 40.2               | 84.7                 | 123.1              | 37.2 (85.9)          |
| PBE0                  | 26.0                | 70.8               | 45.3                 | 89.2               | 88.2                 |
| M06                   | 55.2                | 88.2               | 56.2                 | 59.3               | -                    |
| TPSSh                 | -                   | 70.2               | 33.2                 | 66.7               | 76.2                 |
| B3LYP*                | 102.1               | -                  | 158 (298)            | 120.3              | 136.1                |
| B2PLYP                | 178.2               | -                  | 195 (362)            | 175.6              | 248 (333)            |

Table S3: Summary of Functional Performance for benchmarking of complexes against DLPNO-CCSD(T).

| Functional Category    | Representative Functionals | Performance Summary                                                                 |
|------------------------|----------------------------|-------------------------------------------------------------------------------------|
| Pure GGA               | BP86, BLYP                 | Large underestimation ( $\Delta E$ too small); LS over stabilized                   |
| Meta-GGA               | OLYP                       | Best overall agreement (MAE $\approx$ 26 kJ mol <sup>-1</sup> ); balanced behaviour |
| Hybrid                 | B3LYP, PBE0, TPSSh         | Reliable trends; moderate errors (25–35 kJ mol <sup>-1</sup> )                      |
| Meta-hybrid            | M06                        | Slight overestimation; variable accuracy across metals                              |
| Range-separated hybrid | CAM-B3LYP                  | Excessive $\Delta E$ ; large scatter (MAE > 60 kJ mol <sup>-1</sup> )               |
| Double-hybrid          | B2PLYP                     | Drastically overestimated $\Delta E$ ; unsuitable for                               |

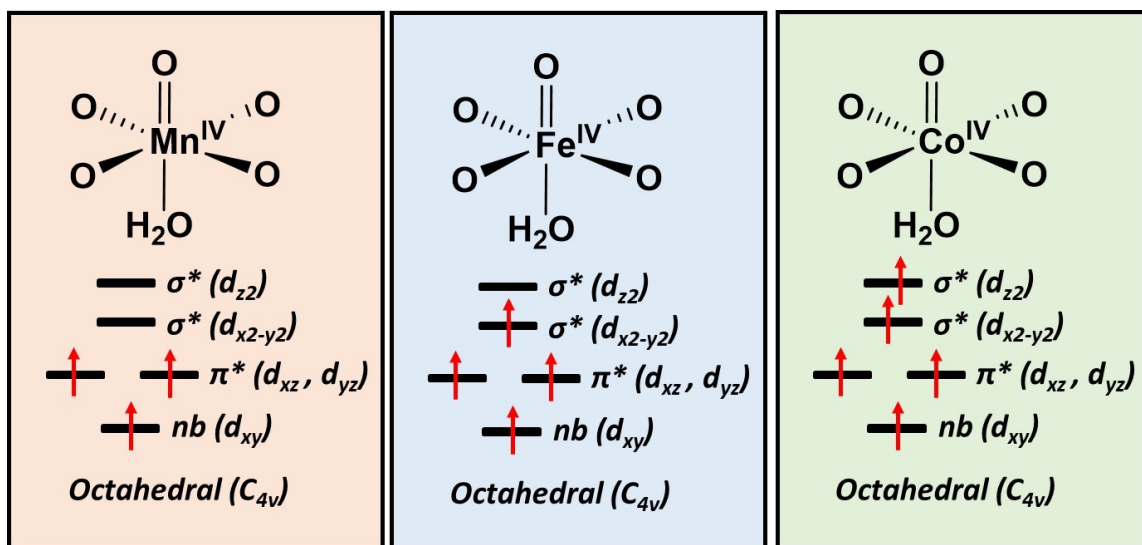

Figure S4: Crystal field splitting of d-orbitals in classical octahedral geometries of Mn<sup>IV</sup>=O, Fe<sup>IV</sup>=O, and Co<sup>IV</sup>=O complexes with Cucurbit[5]uril.

Table S4: Previous reports of C-H activation by Fe<sup>IV</sup>=O with DHA.

| Complex                                                                   | $\Delta G^\ddagger$ (kJ/mol) | References                                                                                  |
|---------------------------------------------------------------------------|------------------------------|---------------------------------------------------------------------------------------------|
| $[(\text{TMC})\text{Fe}^{\text{IV}}=\text{O}(\text{CH}_3\text{CN})]^{2+}$ | 70.6                         | Siegbahn & Co-workers, <i>J. Phys. Chem. C</i> <b>2007</b> , <i>111</i> , 12397-12406       |
| $[(\text{TMC})\text{Fe}^{\text{IV}}=\text{O}(\text{CF}_3\text{CO}_2)]^+$  | 60.6                         |                                                                                             |
| $[(\text{H}_3\text{buea})\text{Fe}^{\text{IV}}=\text{O}]^-$               | 109.1                        | Borovik, Shaik & Coworkers, <i>J. Am. Chem. Soc.</i> <b>2013</b> , <i>135</i> , 17090-17104 |
| $[(\text{H1}^{\text{cyp}})\text{Fe}^{\text{IV}}=\text{O}]^-$              | 88.2                         |                                                                                             |
| $[(\text{N4Py})\text{Fe}^{\text{IV}}=\text{O}]^{2+}$                      | 36.8                         |                                                                                             |
| Cpd-I of HRP                                                              | 59.4                         | Eldik & Coworkers, <i>Chem. Eur. J.</i> <b>2014</b> , <i>20</i> , 14437 – 14450             |
| Cpd-II of HRP                                                             | 68.6                         |                                                                                             |
| $[(\text{TMC})\text{Fe}^{\text{IV}}=\text{O}(\text{CH}_3\text{CN})]^{2+}$ | 108.3                        | Shaik & Coworker, <i>J. Am. Chem. Soc.</i> <b>2015</b> , <i>137</i> , 722-733               |
| $[(\text{TMC})\text{Fe}^{\text{IV}}=\text{O}(\text{CH}_2\text{S})]^+$     | 110.4                        |                                                                                             |
| $[(\text{TMC})\text{Fe}^{\text{IV}}=\text{O}(\text{N}_3)]^+$              | 106.2                        |                                                                                             |
| Cpd I                                                                     | 38.9                         | Visser & Coworker <i>Chem. Eur. J.</i> <b>2015</b> , <i>21</i> , 9083-9092                  |
| $[(\text{Bn-TPEN})\text{Fe}^{\text{IV}}=\text{O}]^{2+}$                   | 60.2                         | Shaik & Coworker, <i>J. Am. Chem. Soc.</i> <b>2016</b> , <i>138</i> , 2094-2097             |
| $[(\text{TMG3tren})\text{Fe}^{\text{IV}}=\text{O}]^{2+}$                  | 60.2                         | Que, Cramer & Coworker <i>Chem. Commun.</i> , <b>2016</b> , <i>52</i> , 10509-10512         |

|                                                                |      |                                                                           |
|----------------------------------------------------------------|------|---------------------------------------------------------------------------|
| [TMG <sub>2</sub> dien(MeCN)Fe <sup>IV</sup> =O] <sup>2+</sup> | 45.6 |                                                                           |
| [(6-PhTPA)Fe <sup>IV</sup> =O] <sup>2+</sup>                   | 58.3 | Rajraman & Coworker <i>Chem. Commun.</i> <b>2017</b> , 53, 3193-3196      |
| [(TPFPP)Fe <sup>IV</sup> =O] <sup>2+</sup>                     | 73.6 | Shaik & Coworker, <i>J. Am. Chem. Soc.</i> <b>2017</b> , 139, 11451-11459 |

Table S5: Reported Fe-O bond distance in Fe<sup>IV</sup>=O and Fe<sup>V</sup>=O moieties.

| Species                                                                     | Fe-O (Å) | Reference                                                                                                       |
|-----------------------------------------------------------------------------|----------|-----------------------------------------------------------------------------------------------------------------|
| CPO-I                                                                       | 1.65     | <i>Proc. Natl. Acad. Sci. U.S.A</i> <b>2005</b> , 102 (46), 16563-16565.                                        |
| TauD-J                                                                      | 1.62     | <i>Inorg. Chem.</i> <b>2005</b> , 44 (4), 742-757.                                                              |
| [(H <sub>2</sub> O) <sub>5</sub> Fe <sup>IV</sup> =O] <sup>2+</sup>         | 1.62     | <i>Angew. Chem. Int. Ed.</i> <b>2005</b> , 44, 6871–6874                                                        |
| [(TMG <sub>3</sub> tren)Fe <sup>IV</sup> =O] <sup>2+</sup>                  | 1.66     | <i>Angew. Chem. Int. Ed.</i> <b>2009</b> , 48, 3622–3626; <i>J. Am. Chem. Soc.</i> <b>2010</b> , 132, 8635–8644 |
| [(H <sub>3</sub> buea)Fe <sup>IV</sup> =O] <sup>-</sup>                     | 1.68     | <i>J. Am. Chem. Soc.</i> <b>2010</b> , 132, 12188–12190                                                         |
| [(Me <sub>4</sub> cy)Fe <sup>IV</sup> =O(CH <sub>3</sub> CN)] <sup>2+</sup> | 1.65     | <i>Science</i> <b>2003</b> , 299, 1037–1039                                                                     |
| [(Me <sub>4</sub> cyS)Fe <sup>IV</sup> =O] <sup>+</sup>                     | 1.70     | <i>Science</i> <b>2005</b> , 310, 1000–1002                                                                     |
| [(TAML)Fe <sup>V</sup> =O] <sup>-</sup>                                     | 1.58     | <i>Science</i> <b>2007</b> , 315, 835–838                                                                       |

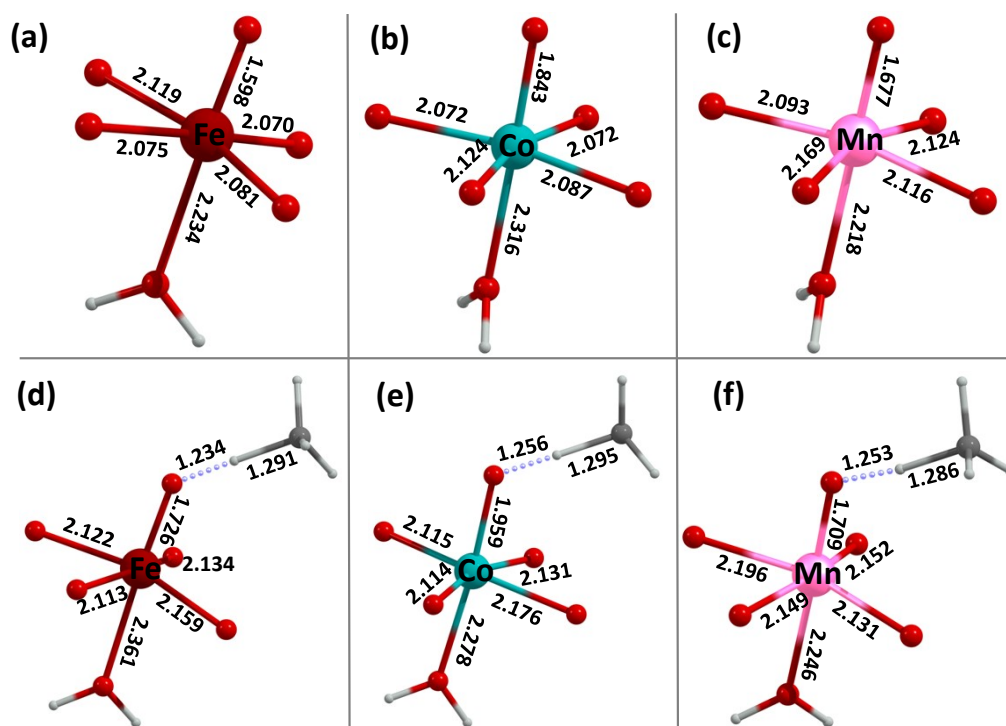

Figure S5: The optimised geometries of (a) Fe<sup>IV</sup>=O, (b) Co<sup>IV</sup>=O, and (c) Mn<sup>IV</sup>=O complexes in first row and below their crossponding transition state (d), (e), and (f) with methane along with their structure parameters. (only primary coordination has been taken for clarity).

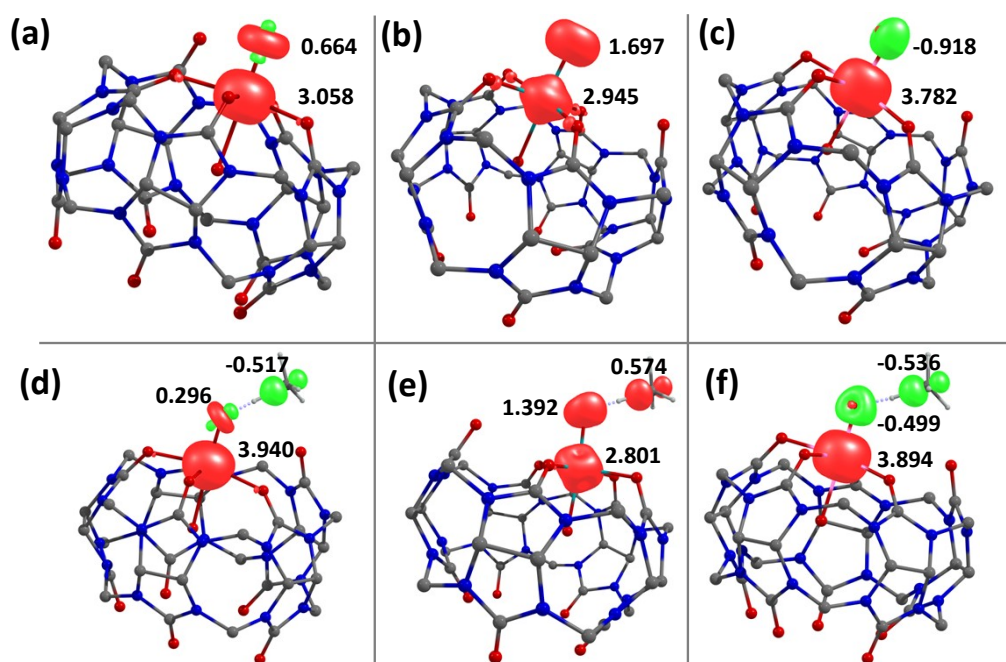

Figure S6: The spin density plots of optimised geometries of (a) Fe<sup>IV</sup>=O, (b) Co<sup>IV</sup>=O, and (c) Mn<sup>IV</sup>=O complexes and for transition state (d) Fe<sup>IV</sup>=O, (e) Co<sup>IV</sup>=O, and (f) Mn<sup>IV</sup>=O, with methane. (hydrogen atoms are omitted for clarity).

Table S6: Bond distance primary coordination sphere of Fe<sup>IV</sup>=O, Co<sup>IV</sup>=O, and Mn<sup>IV</sup>=O complexes and their corresponding transition state.

|                     | rc_Mn <sup>IV</sup> =O | ts_Mn <sup>IV</sup> =O | rc_Fe <sup>IV</sup> =O | ts_Fe <sup>IV</sup> =O | rc_Co <sup>IV</sup> =O | ts_Co <sup>IV</sup> =O |
|---------------------|------------------------|------------------------|------------------------|------------------------|------------------------|------------------------|
| Fe-O <sub>oxo</sub> | 1.677                  | 1.709                  | 1.598                  | 1.726                  | 1.843                  | 1.959                  |
| Fe-O <sub>1</sub>   | 2.093                  | 2.196                  | 2.119                  | 2.122                  | 2.072                  | 2.115                  |
| Fe-O <sub>2</sub>   | 2.124                  | 2.152                  | 2.070                  | 2.134                  | 2.072                  | 2.131                  |
| Fe-O <sub>3</sub>   | 2.116                  | 2.131                  | 2.081                  | 2.159                  | 2.087                  | 2.176                  |
| Fe-O <sub>4</sub>   | 2.169                  | 2.149                  | 2.075                  | 2.113                  | 2.124                  | 2.114                  |
| Fe-O <sub>H2O</sub> | 2.218                  | 2.246                  | 2.234                  | 2.361                  | 2.316                  | 2.278                  |

Table S7: Energy calculated for def2-TZVP optimisations for checking basis set dependency of spin state and energy barrier.

| Species                             | Relative energies (kJ/mol) |
|-------------------------------------|----------------------------|
| <sup>4</sup> rc_Mn <sup>IV</sup> =O | 0.0                        |
| <sup>2</sup> rc_Mn <sup>IV</sup> =O | 115                        |
| <sup>4</sup> ts_Mn <sup>IV</sup> =O | 54.8                       |
| <sup>6</sup> rc_Co <sup>IV</sup> =O | 0.0                        |
| <sup>4</sup> rc_Co <sup>IV</sup> =O | 100.3                      |

|                        |       |
|------------------------|-------|
| ${}^6t_{s\_Co^{IV}=O}$ | 43.68 |
|------------------------|-------|

Table  
The

S8:

| Functional       | Mn <sup>V</sup> =O         |                            | Fe <sup>V</sup> =O         |                            |
|------------------|----------------------------|----------------------------|----------------------------|----------------------------|
|                  | $\langle S^2 \rangle_{BS}$ | $\langle S^2 \rangle_{HS}$ | $\langle S^2 \rangle_{BS}$ | $\langle S^2 \rangle_{HS}$ |
| <b>BP86</b>      | 0.263                      | 2.098                      | 2.089                      | 3.794                      |
| <b>BLYP</b>      | 0.288                      | 2.122                      | 1.954                      | 3.798                      |
| <b>OLYP</b>      | 0.190                      | 2.221                      | 2.194                      | 3.982                      |
| <b>B3LYP</b>     | 0.040                      | 2.329                      | 2.470                      | 3.898                      |
| <b>CAM-B3LYP</b> | 0.324                      | 2.168                      | 2.094                      | 3.938                      |
| <b>PBE0</b>      | 0.495                      | 2.295                      | 2.304                      | 4.021                      |
| <b>M06</b>       | 0.489                      | 2.066                      | 0.829                      | 3.979                      |
| <b>TPSSH</b>     | 0.203                      | 2.303                      | 0.859                      | 3.911                      |
| <b>B3LYP*</b>    | --                         | --                         | 2.206                      | 3.692                      |
| <b>B2PLYP</b>    | --                         | --                         | 2.049                      | 3.632                      |

computed spin-expectation ( $\langle S^2 \rangle$ ) value for Mn<sup>V</sup>=O and Fe<sup>V</sup>=O species.

**Table S9:** Optimised geometries (in Angstroms) of all catalytic species in the DFT model were obtained using the unrestricted B3LYP-D3 functional with the LanL2DZ for metal and 6-31g\* for other atoms, basis set.

| <sup>5</sup> Fe <sup>IV</sup> =O Species |              |              |              |
|------------------------------------------|--------------|--------------|--------------|
| Fe                                       | -0.066979000 | -0.474808000 | -2.543355000 |
| C                                        | 0.870636000  | 3.612044000  | -1.813407000 |
| N                                        | 2.017321000  | 3.627438000  | -1.027354000 |
| C                                        | 1.771777000  | 4.080424000  | 0.337397000  |
| C                                        | 0.236508000  | 4.443087000  | 0.322804000  |
| N                                        | -0.161291000 | 4.140348000  | -1.047548000 |
| N                                        | -0.326839000 | 3.559477000  | 1.318332000  |
| C                                        | 0.604963000  | 2.636279000  | 1.785176000  |
| N                                        | 1.860880000  | 3.041085000  | 1.337723000  |
| C                                        | 3.087606000  | 2.635165000  | 2.012847000  |
| N                                        | 3.665080000  | 1.397282000  | 1.536298000  |
| C                                        | 3.541964000  | 0.222402000  | 2.278666000  |
| N                                        | 3.964313000  | -0.828580000 | 1.447951000  |
| C                                        | 4.336193000  | -0.372027000 | 0.134156000  |
| C                                        | 4.199214000  | 1.186929000  | 0.216591000  |
| N                                        | 3.273029000  | 1.512956000  | -0.874038000 |
| C                                        | 2.731008000  | 0.389013000  | -1.416431000 |
| N                                        | 3.385526000  | -0.712101000 | -0.928273000 |
| C                                        | 3.811164000  | -2.206962000 | 1.865810000  |
| N                                        | 2.575720000  | -2.861880000 | 1.417824000  |
| C                                        | 1.394984000  | -2.742380000 | 2.147510000  |
| N                                        | 0.356886000  | -3.331485000 | 1.365078000  |
| C                                        | 0.937323000  | -4.179969000 | 0.331051000  |
| C                                        | 2.414464000  | -3.656392000 | 0.228698000  |
| N                                        | 0.386600000  | -3.917263000 | -0.995716000 |
| C                                        | 1.173397000  | -3.017804000 | -1.660926000 |
| N                                        | 2.371244000  | -2.913161000 | -1.041531000 |
| C                                        | -0.902412000 | -3.688432000 | 2.045298000  |
| N                                        | -2.055528000 | -3.007709000 | 1.507777000  |
| C                                        | -2.570295000 | -1.865669000 | 2.141561000  |
| N                                        | -3.611177000 | -1.385815000 | 1.344085000  |
| C                                        | -3.823909000 | -2.190054000 | 0.170061000  |
| C                                        | -2.771720000 | -3.359932000 | 0.310344000  |
| N                                        | -3.418616000 | -1.564280000 | -1.100999000 |
| C                                        | -2.321253000 | -2.142440000 | -1.634458000 |
| N                                        | -1.980976000 | -3.253665000 | -0.926944000 |
| C                                        | -4.435132000 | -0.254748000 | 1.780072000  |
| N                                        | -3.960652000 | 1.053970000  | 1.376738000  |
| C                                        | -3.122284000 | 1.802555000  | 2.217997000  |
| N                                        | -2.680128000 | 2.898364000  | 1.473572000  |
| C                                        | -3.230232000 | 2.945454000  | 0.144332000  |
| C                                        | -4.042652000 | 1.609335000  | 0.052481000  |
| N                                        | -2.237898000 | 2.820644000  | -0.927002000 |
| C                                        | -2.221729000 | 1.561197000  | -1.444027000 |
| N                                        | -3.306333000 | 0.863861000  | -0.975109000 |
| C                                        | 3.375411000  | -2.012206000 | -1.562968000 |
| C                                        | -0.980766000 | -4.199040000 | -1.401946000 |
| C                                        | -3.876854000 | -0.296820000 | -1.628419000 |
| O                                        | 1.250546000  | -2.231237000 | 3.226308000  |
| O                                        | -2.187265000 | -1.409176000 | 3.189146000  |
| O                                        | -2.868806000 | 1.568216000  | 3.372652000  |
| O                                        | 0.855139000  | -2.378225000 | -2.685025000 |
| O                                        | 1.798448000  | 0.374924000  | -2.254290000 |
| O                                        | -1.729350000 | -1.712887000 | -2.651130000 |
| O                                        | -1.354611000 | 1.131955000  | -2.239890000 |
| C                                        | -1.620246000 | 3.747925000  | 1.967293000  |
| C                                        | 3.154699000  | 2.867634000  | -1.452867000 |
| C                                        | -1.511962000 | 3.972621000  | -1.496875000 |
| O                                        | 3.181798000  | 0.127656000  | 3.425025000  |
| O                                        | 0.366150000  | 1.649842000  | 2.457174000  |
| O                                        | 0.791391000  | 3.225648000  | -2.960677000 |
| O                                        | -0.022584000 | -0.271272000 | -4.128334000 |
| O                                        | -0.138326000 | -0.678087000 | -0.319539000 |
| H                                        | -0.091241000 | -1.494905000 | 0.224241000  |
| H                                        | -0.019042000 | 0.061684000  | 0.306953000  |
| H                                        | -0.802495000 | -3.369126000 | 3.086198000  |
| H                                        | -1.049077000 | -4.774373000 | 2.002596000  |
| H                                        | -5.456238000 | -0.410363000 | 1.416833000  |
| H                                        | -4.431562000 | -0.253669000 | 2.872090000  |
| H                                        | 3.791219000  | -2.194563000 | 2.957574000  |
| H                                        | 4.660816000  | -2.804454000 | 1.521072000  |



|   |              |              |              |    |              |                           |              |
|---|--------------|--------------|--------------|----|--------------|---------------------------|--------------|
| O | -1.910277000 | -1.576808000 | -2.670346000 | H  | 5.186144000  | 1.872459000               | 0.548502000  |
| O | 0.979579000  | -1.403327000 | -2.164217000 | H  | 2.273162000  | 4.904475000               | -0.057904000 |
| O | -2.197252000 | 1.027742000  | -2.634397000 | H  | 4.597866000  | -2.666217000              | -1.224849000 |
| O | 0.612055000  | 1.529501000  | -2.150195000 | H  | 3.690300000  | -1.909274000              | -2.559486000 |
| C | 2.975937000  | 2.817130000  | 1.947812000  | H  | 3.103552000  | 2.681404000               | -2.598436000 |
| C | 3.802838000  | -1.957170000 | -1.474804000 | H  | 3.806634000  | 3.665013000               | -1.288697000 |
| C | 3.205604000  | 2.779291000  | -1.516050000 |    |              |                           |              |
| O | 1.235857000  | -2.956242000 | 3.403066000  |    |              | <b><sup>1</sup>FeIV=O</b> |              |
| O | 1.700704000  | 0.231903000  | 2.447019000  | Fe | -0.585662000 | -0.097840000              | -2.465227000 |
| O | 3.383797000  | 0.381922000  | -2.996761000 | C  | 3.745537000  | 0.454581000               | -1.839414000 |
| O | -0.324755000 | -0.062089000 | -4.050766000 | N  | 4.150238000  | -0.615094000              | -1.047537000 |
| O | -0.794446000 | -0.091388000 | -0.264714000 | C  | 4.466582000  | -0.228034000              | 0.322127000  |
| H | -1.510242000 | -0.445519000 | 0.308513000  | C  | 4.268139000  | 1.336834000               | 0.307226000  |
| H | -0.021748000 | 0.033362000  | 0.318458000  | N  | 3.853959000  | 1.603955000               | -1.065327000 |
| H | -3.442661000 | -0.427004000 | 3.085864000  | N  | 3.240109000  | 1.554060000               | 1.299777000  |
| H | -4.849692000 | -0.676018000 | 2.004909000  | C  | 2.698496000  | 0.359087000               | 1.763864000  |
| H | -2.260574000 | 4.962334000  | 1.424184000  | N  | 3.511905000  | -0.677000000              | 1.311312000  |
| H | -1.749763000 | 4.050658000  | 2.873404000  | C  | 3.558589000  | -1.966058000              | 1.989426000  |
| H | -0.733407000 | -4.331418000 | 2.925665000  | N  | 2.600321000  | -2.938122000              | 1.509909000  |
| H | -1.004884000 | -5.346327000 | 1.480548000  | C  | 1.462948000  | -3.247286000              | 2.254342000  |
| H | -3.066016000 | -4.513196000 | 0.138679000  | N  | 0.629467000  | -4.014156000              | 1.421152000  |
| H | -4.623506000 | -2.640661000 | 0.556700000  | C  | 1.171830000  | -4.156202000              | 0.094722000  |
| H | -5.212345000 | 1.520168000  | 0.386064000  | C  | 2.587880000  | -3.498596000              | 0.182177000  |
| H | -4.061610000 | 3.683834000  | 0.109672000  | N  | 2.576782000  | -2.505405000              | -0.894443000 |
| H | -0.131872000 | 5.320773000  | -0.304281000 | C  | 1.319034000  | -2.323847000              | -1.392040000 |
| H | -5.316760000 | -0.633663000 | -1.043600000 | N  | 0.511236000  | -3.338173000              | -0.924818000 |
| H | -4.293793000 | -0.505001000 | -2.493224000 | C  | -0.717010000 | -4.349877000              | 1.831432000  |
| H | -1.510074000 | 3.259735000  | -2.685629000 | N  | -1.763788000 | -3.415492000              | 1.387586000  |
| H | -1.906541000 | 4.550616000  | -1.531284000 | C  | -2.082161000 | -2.284726000              | 2.136252000  |
| H | -0.656247000 | -3.554793000 | -2.651097000 | N  | -3.004932000 | -1.515273000              | 1.361358000  |
| H | -0.752524000 | -4.892844000 | -1.484487000 | C  | -3.588136000 | -2.348322000              | 0.317677000  |
| H | 3.323069000  | -1.842629000 | 3.046937000  | C  | -2.571553000 | -3.541593000              | 0.203422000  |
| H | 4.569140000  | -2.376087000 | 1.886972000  | N  | -3.529776000 | -1.720546000              | -1.002298000 |
| H | 3.868467000  | 3.441818000  | 1.829688000  | C  | -2.405937000 | -2.127414000              | -1.659224000 |
| H | 2.792082000  | 2.649867000  | 3.011539000  | N  | -1.898660000 | -3.225770000              | -1.070391000 |
| H | 1.165580000  | -5.210352000 | -0.224267000 | C  | -3.779118000 | -0.459875000              | 2.043631000  |
| H | 3.395476000  | -4.215676000 | 0.024388000  | N  | -3.543444000 | 0.860672000               | 1.508018000  |
| H | 5.481805000  | -0.560515000 | 0.580959000  | C  | -2.636363000 | 1.733486000               | 2.133822000  |

|   |              |              |              |    |              |                                       |              |
|---|--------------|--------------|--------------|----|--------------|---------------------------------------|--------------|
| N | -2.560076000 | 2.884053000  | 1.347400000  | H  | -1.768191000 | 4.041477000                           | 2.874022000  |
| C | -3.397471000 | 2.812674000  | 0.180833000  | H  | -0.716689000 | -4.335345000                          | 2.923345000  |
| C | -4.130838000 | 1.418565000  | 0.319158000  | H  | -0.982756000 | -5.350881000                          | 1.477667000  |
| N | -2.675493000 | 2.651157000  | -1.097153000 | H  | -3.045119000 | -4.526314000                          | 0.135208000  |
| C | -2.826329000 | 1.421129000  | -1.615660000 | H  | -4.611102000 | -2.661183000                          | 0.552568000  |
| N | -3.761128000 | 0.720423000  | -0.926264000 | H  | -5.221376000 | 1.497164000                           | 0.384760000  |
| C | -1.777602000 | 4.047820000  | 1.782052000  | H  | -4.079353000 | 3.665942000                           | 0.109218000  |
| N | -0.389318000 | 4.059111000  | 1.370598000  | H  | -0.156426000 | 5.318097000                           | -0.303071000 |
| C | 0.613574000  | 3.548507000  | 2.211313000  | H  | -5.314012000 | -0.657957000                          | -1.046284000 |
| N | 1.789126000  | 3.517139000  | 1.459435000  | H  | -4.291144000 | -0.521950000                          | -2.495315000 |
| C | 1.628215000  | 4.029330000  | 0.122658000  | H  | -1.525770000 | 3.251817000                           | -2.685486000 |
| C | 0.092608000  | 4.306772000  | 0.038366000  | H  | -1.926573000 | 4.541246000                           | -1.531001000 |
| N | 1.859232000  | 3.044413000  | -0.935913000 | H  | -0.636701000 | -3.553759000                          | -2.652673000 |
| C | 0.684411000  | 2.542491000  | -1.416979000 | H  | -0.727259000 | -4.893647000                          | -1.487801000 |
| N | -0.350701000 | 3.330826000  | -0.962619000 | H  | 3.327968000  | -1.827176000                          | 3.048082000  |
| C | -0.678647000 | -3.805674000 | -1.591994000 | H  | 4.578227000  | -2.354911000                          | 1.890090000  |
| C | -4.287556000 | -0.547761000 | -1.404491000 | H  | 3.852336000  | 3.458496000                           | 1.831407000  |
| C | -1.623127000 | 3.494984000  | -1.626686000 | H  | 2.779232000  | 2.661714000                           | 3.012887000  |
| O | -1.661752000 | -1.981024000 | 3.220451000  | H  | 1.188206000  | -5.203633000                          | -0.227461000 |
| O | -2.057566000 | 1.519906000  | 3.168846000  | H  | 3.414253000  | -4.200530000                          | 0.024710000  |
| O | 0.489659000  | 3.240669000  | 3.370013000  | H  | 5.483982000  | -0.536770000                          | 0.585248000  |
| O | -1.902093000 | -1.585246000 | -2.674453000 | H  | 5.178217000  | 1.895119000                           | 0.551478000  |
| O | 0.986630000  | -1.390038000 | -2.154679000 | H  | 2.250403000  | 4.913154000                           | -0.057232000 |
| O | -2.198489000 | 1.016093000  | -2.629867000 | H  | 4.610077000  | -2.646377000                          | -1.222920000 |
| O | 0.607314000  | 1.533174000  | -2.154261000 | H  | 3.700149000  | -1.892503000                          | -2.557654000 |
| C | 2.962648000  | 2.829724000  | 1.949199000  | H  | 3.093198000  | 2.694586000                           | -2.596870000 |
| C | 3.812817000  | -1.939896000 | -1.472958000 | H  | 3.790293000  | 3.681726000                           | -1.286549000 |
| C | 3.194074000  | 2.792892000  | -1.514412000 |    |              |                                       |              |
| O | 1.247088000  | -2.952417000 | 3.403237000  |    |              | <sup>5</sup> Fe <sup>IV</sup> =O (ts) |              |
| O | 1.693788000  | 0.239110000  | 2.440871000  | Fe | -0.344063000 | -0.261542000                          | 2.550831000  |
| O | 3.385807000  | 0.396956000  | -2.995411000 | C  | 3.159974000  | 1.945620000                           | 1.550840000  |
| O | -0.324480000 | -0.064172000 | -4.051111000 | N  | 2.781537000  | 3.033027000                           | 0.776247000  |
| O | -0.793477000 | -0.092140000 | -0.261877000 | C  | 3.264552000  | 2.958296000                           | -0.597674000 |
| H | -1.507517000 | -0.453806000 | 0.308897000  | C  | 4.095527000  | 1.619275000                           | -0.610097000 |
| H | -0.023904000 | 0.039269000  | 0.324155000  | N  | 3.959095000  | 1.134002000                           | 0.757711000  |
| H | -3.442966000 | -0.445015000 | 3.083947000  | N  | 3.435365000  | 0.820173000                           | -1.618461000 |
| H | -4.848020000 | -0.700375000 | 2.001958000  | C  | 2.331572000  | 1.467010000                           | -2.175916000 |
| H | -2.282522000 | 4.951436000  | 1.424987000  | N  | 2.247155000  | 2.734675000                           | -1.600826000 |

|   |              |              |              |   |              |              |              |
|---|--------------|--------------|--------------|---|--------------|--------------|--------------|
| C | 1.435355000  | 3.780141000  | -2.213350000 | C | 0.997207000  | -3.811258000 | 1.452258000  |
| N | 0.093340000  | 3.892256000  | -1.681392000 | O | -2.647098000 | 0.459682000  | -3.267937000 |
| C | -1.009586000 | 3.420948000  | -2.396529000 | O | -0.806233000 | -2.522094000 | -3.308264000 |
| N | -2.114707000 | 3.497928000  | -1.532742000 | O | 2.241681000  | -2.203913000 | -3.594368000 |
| C | -1.757465000 | 3.979313000  | -0.225836000 | O | -2.415047000 | 0.043471000  | 2.599924000  |
| C | -0.240167000 | 4.346652000  | -0.356335000 | O | -0.160910000 | 1.799085000  | 2.094473000  |
| N | 0.389752000  | 3.586023000  | 0.724079000  | O | -1.019577000 | -2.267798000 | 2.622919000  |
| C | -0.477556000 | 2.694478000  | 1.282409000  | O | 1.582890000  | -1.014564000 | 2.106592000  |
| N | -1.745960000 | 2.958718000  | 0.827760000  | C | 4.010822000  | -0.357742000 | -2.255522000 |
| C | -3.380325000 | 2.893510000  | -1.893078000 | C | 1.732306000  | 3.888105000  | 1.245275000  |
| N | -3.581044000 | 1.522013000  | -1.415922000 | C | 4.264728000  | -0.191823000 | 1.204853000  |
| C | -3.212932000 | 0.430079000  | -2.203621000 | O | -1.023198000 | 3.057501000  | -3.545563000 |
| N | -3.645599000 | -0.726883000 | -1.538276000 | O | 1.583803000  | 1.010584000  | -3.013938000 |
| C | -4.363105000 | -0.444517000 | -0.323163000 | O | 2.865764000  | 1.751284000  | 2.713481000  |
| C | -4.276804000 | 1.128881000  | -0.217838000 | O | -0.105247000 | -0.116510000 | 4.196252000  |
| N | -3.695857000 | -0.901675000 | 0.905856000  | O | -0.596648000 | -0.410095000 | 0.201422000  |
| C | -3.144932000 | 0.139531000  | 1.589686000  | H | -1.163941000 | -0.991945000 | -0.346300000 |
| N | -3.527881000 | 1.312970000  | 1.036263000  | H | -0.000436000 | 0.037313000  | -0.423178000 |
| C | -3.332716000 | -2.034182000 | -2.064200000 | H | -3.072826000 | -1.896880000 | -3.117241000 |
| N | -2.170098000 | -2.661014000 | -1.414550000 | H | -4.204071000 | -2.694591000 | -1.979299000 |
| C | -1.034335000 | -2.970752000 | -2.215388000 | H | 1.260034000  | -5.298499000 | -1.633665000 |
| N | -0.250865000 | -3.863860000 | -1.488298000 | H | 1.027393000  | -4.258513000 | -3.068428000 |
| C | -0.891815000 | -4.303870000 | -0.276329000 | H | -3.399966000 | 2.863741000  | -2.984567000 |
| C | -2.314422000 | -3.641127000 | -0.347199000 | H | -4.207220000 | 3.511383000  | -1.527581000 |
| N | -0.365691000 | -3.735197000 | 0.974152000  | H | -5.253022000 | 1.618292000  | -0.135092000 |
| C | -1.268022000 | -2.949736000 | 1.607877000  | H | -5.389166000 | -0.828309000 | -0.347459000 |
| N | -2.476177000 | -3.034974000 | 0.971723000  | H | -3.122445000 | -4.354129000 | -0.544838000 |
| C | 1.069872000  | -4.276786000 | -1.977366000 | H | -0.913728000 | -5.396530000 | -0.204616000 |
| N | 2.165665000  | -3.408955000 | -1.600114000 | H | 3.266745000  | -4.291138000 | -0.034454000 |
| C | 2.590984000  | -2.376185000 | -2.453569000 | H | -4.536304000 | -2.796548000 | 1.078858000  |
| N | 3.523776000  | -1.622057000 | -1.741107000 | H | -3.611041000 | -2.230436000 | 2.489869000  |
| C | 3.788662000  | -2.140629000 | -0.423856000 | H | 0.974568000  | -3.579866000 | 2.518214000  |
| C | 2.788876000  | -3.342123000 | -0.304109000 | H | 1.367902000  | -4.832190000 | 1.318383000  |
| N | 3.393870000  | -1.254040000 | 0.674317000  | H | -2.732438000 | 2.406707000  | 2.576153000  |
| C | 2.231689000  | -1.662614000 | 1.257348000  | H | -3.690727000 | 3.350335000  | 1.412553000  |
| N | 1.909282000  | -2.909904000 | 0.784464000  | H | 1.314115000  | 3.550577000  | -3.274423000 |
| C | -2.952214000 | 2.550057000  | 1.517342000  | H | 1.967764000  | 4.731885000  | -2.102994000 |
| C | -3.634625000 | -2.268519000 | 1.399821000  | H | 5.100489000  | -0.303219000 | -2.151955000 |



|   |              |              | <b><sup>4</sup>Fe<sup>III</sup>-OH</b> |    |              |              |              |
|---|--------------|--------------|----------------------------------------|----|--------------|--------------|--------------|
| O | -0.554020000 | -1.946120000 | 2.798410000                            |    |              |              |              |
| O | -0.937844000 | -3.031971000 | -2.977319000                           | Fe | 0.145591000  | 0.483631000  | -2.477427000 |
| O | -0.010945000 | 0.091136000  | -4.393251000                           | C  | -1.295635000 | -3.345280000 | -1.865171000 |
| O | 0.190800000  | 0.679019000  | -0.279195000                           | N  | -2.444455000 | -3.246571000 | -1.094854000 |
| H | 0.193597000  | 1.473311000  | 0.294615000                            | C  | -2.286707000 | -3.788903000 | 0.250465000  |
| H | 0.036081000  | -0.072593000 | 0.318775000                            | C  | -0.814246000 | -4.346573000 | 0.237531000  |
| H | 0.999739000  | 3.339289000  | 3.137683000                            | N  | -0.356029000 | -4.030709000 | -1.111448000 |
| H | 1.334391000  | 4.721297000  | 2.047822000                            | N  | -0.162292000 | -3.609797000 | 1.297029000  |
| H | 5.444968000  | 0.090519000  | 1.492443000                            | C  | -1.010599000 | -2.683216000 | 1.904254000  |
| H | 4.381418000  | -0.017109000 | 2.924536000                            | N  | -2.269043000 | -2.805959000 | 1.311550000  |
| H | -3.630018000 | 2.377250000  | 2.997826000                            | C  | -3.454216000 | -2.250006000 | 1.955748000  |
| H | -4.479195000 | 3.054606000  | 1.579072000                            | N  | -3.827993000 | -0.926306000 | 1.498278000  |
| H | -2.901577000 | 4.622396000  | 0.221247000                            | C  | -3.561036000 | 0.206051000  | 2.270420000  |
| H | -0.562893000 | 5.296878000  | 0.613066000                            | N  | -3.852428000 | 1.323702000  | 1.468093000  |
| H | 3.479512000  | 4.163798000  | 0.427669000                            | C  | -4.268298000 | 0.951493000  | 0.141829000  |
| H | 4.997698000  | 2.244894000  | 0.171217000                            | C  | -4.347959000 | -0.614472000 | 0.191708000  |
| H | 4.993570000  | -2.028341000 | -0.216516000                           | N  | -3.488219000 | -1.033388000 | -0.918450000 |
| H | 1.550328000  | 5.127254000  | -0.986070000                           | C  | -2.775480000 | 0.012223000  | -1.416377000 |
| H | 1.253305000  | 4.147026000  | -2.440589000                           | N  | -3.264513000 | 1.183050000  | -0.902737000 |
| H | 3.682663000  | 0.096497000  | -2.650324000                           | C  | -3.486288000 | 2.658511000  | 1.896350000  |
| H | 5.006382000  | -0.011580000 | -1.468937000                           | N  | -2.172547000 | 3.127254000  | 1.434333000  |
| H | -3.081849000 | 2.120688000  | -2.598910000                           | C  | -1.020313000 | 2.846538000  | 2.161382000  |
| H | -4.215789000 | 2.758253000  | -1.386414000                           | N  | 0.089512000  | 3.309927000  | 1.389117000  |
| H | -3.072949000 | -2.369408000 | 3.051340000                            | C  | -0.377066000 | 4.253934000  | 0.375978000  |
| H | -4.047834000 | -3.248554000 | 1.838870000                            | C  | -1.909233000 | 3.932160000  | 0.266358000  |
| H | 1.633893000  | -4.950507000 | 1.782915000                            | N  | 0.136620000  | 3.956418000  | -0.955354000 |
| H | 1.324964000  | -3.688914000 | 3.010335000                            | C  | -0.762804000 | 3.187037000  | -1.651185000 |
| H | -5.301993000 | 1.041666000  | -0.103994000                           | N  | -1.967500000 | 3.232338000  | -1.023109000 |
| H | -5.250249000 | -1.407995000 | 0.063970000                            | C  | 1.370994000  | 3.517168000  | 2.094505000  |
| H | -2.697807000 | -4.775292000 | 0.477060000                            | N  | 2.447289000  | 2.714790000  | 1.570963000  |
| H | -0.355660000 | -5.475080000 | 0.448210000                            | C  | 2.777347000  | 1.493372000  | 2.175820000  |
| H | 3.621874000  | -4.056543000 | -0.019164000                           | N  | 3.744340000  | 0.883026000  | 1.376373000  |
| H | -4.259656000 | -3.129619000 | -1.233506000                           | C  | 4.087699000  | 1.676628000  | 0.222738000  |
| H | -3.238871000 | -2.535933000 | -2.567724000                           | C  | 3.197720000  | 2.974347000  | 0.369820000  |
| H | 1.269916000  | -3.874696000 | -2.610857000                           | N  | 3.631271000  | 1.135141000  | -1.066170000 |
| H | 1.819866000  | -4.943420000 | -1.295878000                           | C  | 2.610348000  | 1.849937000  | -1.598503000 |
| H | -0.309228000 | -0.799504000 | -4.663870000                           | N  | 2.397455000  | 2.979130000  | -0.865653000 |
|   |              |              |                                        | C  | 4.412091000  | -0.345061000 | 1.817956000  |

|   |              |              |              |    |              |              |                                        |
|---|--------------|--------------|--------------|----|--------------|--------------|----------------------------------------|
| N | 3.785077000  | -1.582595000 | 1.396389000  | H  | 4.828369000  | -2.380854000 | -0.250524000                           |
| C | 2.833856000  | -2.221884000 | 2.209677000  | H  | 1.930656000  | 5.005122000  | -0.976030000                           |
| N | 2.251276000  | -3.227783000 | 1.433460000  | H  | 1.566288000  | 4.049463000  | -2.432977000                           |
| C | 2.831603000  | -3.339201000 | 0.120481000  | H  | 3.678128000  | -0.154764000 | -2.657332000                           |
| C | 3.811549000  | -2.117865000 | 0.063146000  | H  | 4.991750000  | -0.380086000 | -1.480046000                           |
| N | 1.900056000  | -3.076174000 | -0.978486000 | H  | -2.904429000 | 2.331335000  | -2.605374000                           |
| C | 2.047212000  | -1.814488000 | -1.466035000 | H  | -4.004844000 | 3.048349000  | -1.404735000                           |
| N | 3.192414000  | -1.260325000 | -0.957095000 | H  | -3.253851000 | -2.146496000 | 3.024553000                            |
| C | -3.082464000 | 2.474720000  | -1.538398000 | H  | -4.284326000 | -2.949466000 | 1.805171000                            |
| C | 1.535038000  | 4.054318000  | -1.342503000 | H  | 1.264931000  | -5.050755000 | 1.754990000                            |
| C | 3.922847000  | -0.177855000 | -1.594531000 | H  | 1.048996000  | -3.771049000 | 2.983741000                            |
| O | -0.944265000 | 2.299651000  | 3.230120000  | H  | -5.210717000 | 1.434485000  | -0.140447000                           |
| O | 2.315635000  | 1.070807000  | 3.206750000  | H  | -5.358152000 | -1.012461000 | 0.043590000                            |
| O | 2.596426000  | -1.975994000 | 3.364964000  | H  | -3.042224000 | -4.560233000 | 0.438474000                            |
| O | -0.529856000 | 2.534904000  | -2.683183000 | H  | -0.756455000 | -5.426755000 | 0.413508000                            |
| O | -1.835343000 | -0.089814000 | -2.237072000 | H  | 3.319107000  | -4.308216000 | -0.036156000                           |
| O | 1.974616000  | 1.511654000  | -2.617580000 | H  | -4.479449000 | -2.813910000 | -1.262821000                           |
| O | 1.257989000  | -1.269046000 | -2.272254000 | H  | -3.422844000 | -2.282975000 | -2.595337000                           |
| C | 1.108653000  | -3.977401000 | 1.912653000  | H  | 0.984802000  | -3.958966000 | -2.639038000                           |
| C | -3.506106000 | -2.380219000 | -1.511577000 | H  | 1.446649000  | -5.062564000 | -1.319535000                           |
| C | 1.004663000  | -4.089871000 | -1.555896000 | H  | -0.173074000 | -0.747805000 | -4.349800000                           |
| O | -3.188295000 | 0.227355000  | 3.416197000  |    |              |              |                                        |
| O | -0.710972000 | -1.912189000 | 2.789948000  |    |              |              | <b><sup>2</sup>Fe<sup>III</sup>-OH</b> |
| O | -1.147869000 | -2.928391000 | -3.000015000 | Fe | 0.632166000  | 0.106034000  | -2.450203000                           |
| O | 0.028298000  | 0.205008000  | -4.208737000 | C  | -3.690385000 | -0.301523000 | -1.889170000                           |
| O | 0.251879000  | 0.716726000  | -0.331312000 | N  | -4.053312000 | 0.784485000  | -1.100155000                           |
| H | 0.299253000  | 1.533423000  | 0.218597000  | C  | -4.444076000 | 0.408945000  | 0.252675000                            |
| H | 0.021121000  | -0.009492000 | 0.274322000  | C  | -4.307797000 | -1.162027000 | 0.240518000                            |
| H | 1.218104000  | 3.204971000  | 3.130887000  | N  | -3.872436000 | -1.445606000 | -1.120564000                           |
| H | 1.639737000  | 4.579553000  | 2.061870000  | N  | -3.320034000 | -1.423371000 | 1.265123000                            |
| H | 5.450804000  | -0.318434000 | 1.472684000  | C  | -2.796746000 | -0.252353000 | 1.808813000                            |
| H | 4.389271000  | -0.352252000 | 2.909699000  | N  | -3.523993000 | 0.817655000  | 1.290451000                            |
| H | -3.453974000 | 2.630657000  | 2.987511000  | C  | -3.527473000 | 2.119253000  | 1.943373000                            |
| H | -4.241751000 | 3.379716000  | 1.569660000  | N  | -2.502555000 | 3.031382000  | 1.478780000                            |
| H | -2.548702000 | 4.820853000  | 0.238783000  | C  | -1.380927000 | 3.307747000  | 2.258287000                            |
| H | -0.166102000 | 5.292444000  | 0.653186000  | N  | -0.496876000 | 4.045754000  | 1.449756000                            |
| H | 3.778613000  | 3.900778000  | 0.436084000  | C  | -0.999533000 | 4.218419000  | 0.111582000                            |
| H | 5.161945000  | 1.883561000  | 0.175854000  | C  | -2.441662000 | 3.611864000  | 0.160628000                            |

|   |              |              |              |   |              |              |              |
|---|--------------|--------------|--------------|---|--------------|--------------|--------------|
| N | -2.445363000 | 2.639453000  | -0.934079000 | O | 2.239234000  | -1.086612000 | -2.619586000 |
| C | -1.189873000 | 2.429450000  | -1.422548000 | O | -0.622600000 | -1.563510000 | -2.189965000 |
| N | -0.345419000 | 3.387810000  | -0.902441000 | C | -3.105318000 | -2.717796000 | 1.901359000  |
| C | 0.854546000  | 4.312471000  | 1.889886000  | C | -3.684297000 | 2.099773000  | -1.527738000 |
| N | 1.862605000  | 3.330751000  | 1.456628000  | C | -3.286258000 | -2.673879000 | -1.567050000 |
| C | 2.093628000  | 2.170400000  | 2.189272000  | O | -1.209107000 | 3.009766000  | 3.413709000  |
| N | 2.999396000  | 1.365502000  | 1.427417000  | O | -1.873341000 | -0.175734000 | 2.594757000  |
| C | 3.667733000  | 2.193738000  | 0.429599000  | O | -3.309266000 | -0.259248000 | -3.038785000 |
| C | 2.710586000  | 3.431677000  | 0.298037000  | O | 0.399288000  | 0.088454000  | -4.163502000 |
| N | 3.646180000  | 1.598268000  | -0.904735000 | O | 0.776043000  | 0.088194000  | -0.321286000 |
| C | 2.565913000  | 2.063287000  | -1.602212000 | H | 1.499567000  | 0.400222000  | 0.269837000  |
| N | 2.065158000  | 3.160952000  | -0.999325000 | H | -0.023011000 | 0.011839000  | 0.231180000  |
| C | 3.713206000  | 0.281407000  | 2.131911000  | H | 3.341690000  | 0.272199000  | 3.160268000  |
| N | 3.448575000  | -1.024504000 | 1.580513000  | H | 4.790474000  | 0.486211000  | 2.127720000  |
| C | 2.504179000  | -1.873695000 | 2.182207000  | H | 2.058538000  | -5.067589000 | 1.430673000  |
| N | 2.394653000  | -3.006799000 | 1.375083000  | H | 1.560337000  | -4.157177000 | 2.885177000  |
| C | 3.258133000  | -2.949578000 | 0.226036000  | H | 0.831035000  | 4.289022000  | 2.981391000  |
| C | 4.041887000  | -1.589537000 | 0.398889000  | H | 1.177302000  | 5.301638000  | 1.550724000  |
| N | 2.573141000  | -2.744850000 | -1.065324000 | H | 3.230276000  | 4.394543000  | 0.257839000  |
| C | 2.805030000  | -1.524468000 | -1.583518000 | H | 4.689933000  | 2.456856000  | 0.721890000  |
| N | 3.736019000  | -0.861626000 | -0.846933000 | H | 5.126555000  | -1.713362000 | 0.491229000  |
| C | 1.576700000  | -4.153759000 | 1.793330000  | H | 3.907966000  | -3.828012000 | 0.156890000  |
| N | 0.192572000  | -4.122697000 | 1.371691000  | H | -0.069521000 | -5.351625000 | -0.319136000 |
| C | -0.794595000 | -3.551667000 | 2.194591000  | H | 5.364618000  | 0.430979000  | -0.890518000 |
| N | -1.950062000 | -3.444592000 | 1.420308000  | H | 4.394446000  | 0.369298000  | -2.378727000 |
| C | -1.799930000 | -3.983750000 | 0.091689000  | H | 1.416114000  | -3.300518000 | -2.665906000 |
| C | -0.275773000 | -4.332486000 | 0.027968000  | H | 1.778968000  | -4.610942000 | -1.521435000 |
| N | -1.974280000 | -3.006044000 | -0.981770000 | H | 0.849439000  | 3.562518000  | -2.601715000 |
| C | -0.773217000 | -2.550915000 | -1.442317000 | H | 0.981552000  | 4.887055000  | -1.422105000 |
| N | 0.226547000  | -3.366852000 | -0.954527000 | H | -3.336555000 | 1.984429000  | 3.010393000  |
| C | 0.882845000  | 3.803418000  | -1.538153000 | H | -4.520670000 | 2.561219000  | 1.805060000  |
| C | 4.348206000  | 0.383962000  | -1.289151000 | H | -4.015380000 | -3.312644000 | 1.762614000  |
| C | 1.500788000  | -3.556604000 | -1.609066000 | H | -2.931131000 | -2.566189000 | 2.969055000  |
| O | 1.621360000  | 1.866981000  | 3.252161000  | H | -0.972145000 | 5.269312000  | -0.199047000 |
| O | 1.922927000  | -1.655624000 | 3.214867000  | H | -3.237628000 | 4.347617000  | -0.000646000 |
| O | -0.673068000 | -3.253555000 | 3.356156000  | H | -5.460787000 | 0.755578000  | 0.468971000  |
| O | 2.090862000  | 1.553934000  | -2.642748000 | H | -5.247673000 | -1.681228000 | 0.458976000  |
| O | -0.870800000 | 1.526058000  | -2.222982000 | H | -2.459401000 | -4.841655000 | -0.081520000 |



|    |              |                                      |              |   |              |              |              |
|----|--------------|--------------------------------------|--------------|---|--------------|--------------|--------------|
| H  | 4.194412000  | -1.127215000                         | 2.999167000  | C | 2.335214000  | -2.717815000 | 2.245403000  |
| H  | 5.202537000  | -1.536421000                         | 1.582116000  | N | 1.734370000  | -3.688466000 | 1.424396000  |
| H  | 4.166536000  | -3.537380000                         | 0.268704000  | C | 2.283961000  | -3.693107000 | 0.093096000  |
| H  | 2.124875000  | -4.851602000                         | 0.701244000  | C | 3.462841000  | -2.665087000 | 0.161108000  |
| H  | -2.048053000 | -5.009887000                         | 0.460040000  | N | 3.163697000  | -1.724553000 | -0.919701000 |
| H  | -4.082176000 | -3.659128000                         | 0.161156000  | C | 1.903826000  | -1.912396000 | -1.410663000 |
| H  | -5.378327000 | 0.420284000                          | -0.286736000 | N | 1.415459000  | -3.105410000 | -0.928418000 |
| H  | 0.073190000  | -5.370817000                         | -0.935547000 | C | 0.527608000  | -4.366514000 | 1.845447000  |
| H  | 0.075437000  | -4.367124000                         | -2.404820000 | N | -0.730387000 | -3.748984000 | 1.397597000  |
| H  | -3.457264000 | -1.229374000                         | -2.676229000 | C | -1.338474000 | -2.742332000 | 2.141090000  |
| H  | -4.763791000 | -1.517896000                         | -1.506002000 | N | -2.447958000 | -2.265580000 | 1.375075000  |
| H  | 3.594173000  | -1.128243000                         | -2.596608000 | C | -2.790439000 | -3.240624000 | 0.345551000  |
| H  | 4.867164000  | -1.362709000                         | -1.376862000 | C | -1.485787000 | -4.105072000 | 0.223559000  |
| H  | 2.213068000  | 3.212147000                          | 3.010429000  | N | -2.931860000 | -2.643538000 | -0.979038000 |
| H  | 2.871399000  | 4.335291000                          | 1.786375000  | C | -1.749468000 | -2.734164000 | -1.668679000 |
| H  | -3.068387000 | 4.225318000                          | 1.723124000  | N | -0.943552000 | -3.633298000 | -1.060167000 |
| H  | -2.399496000 | 3.119098000                          | 2.957126000  | C | -3.484020000 | -1.484966000 | 2.076898000  |
| H  | 5.368310000  | 0.617255000                          | -0.129657000 | N | -3.649330000 | -0.149046000 | 1.553091000  |
| H  | 4.570301000  | 2.934385000                          | 0.024519000  | C | -3.010675000 | 0.939775000  | 2.168216000  |
| H  | 1.116066000  | 5.374598000                          | 0.420909000  | N | -3.263249000 | 2.065935000  | 1.381574000  |
| H  | -1.326749000 | 5.327677000                          | 0.398011000  | C | -4.053057000 | 1.761481000  | 0.220859000  |
| H  | -4.690503000 | 2.769476000                          | -0.074914000 | C | -4.369955000 | 0.218683000  | 0.364789000  |
| H  | 3.107670000  | 4.261907000                          | -1.289335000 | N | -3.319219000 | 1.802799000  | -1.061518000 |
| H  | 2.302041000  | 3.381244000                          | -2.614277000 | C | -3.132678000 | 0.576598000  | -1.576285000 |
| H  | -2.377011000 | 3.307333000                          | -2.666577000 | N | -3.824025000 | -0.355149000 | -0.881324000 |
| H  | -3.236842000 | 4.160814000                          | -1.358666000 | C | -2.820785000 | 3.398280000  | 1.807690000  |
|    |              | <b><sup>2</sup>Mn<sup>IV</sup>=O</b> |              | N | -1.490716000 | 3.781066000  | 1.380341000  |
| Mn | -0.546708000 | -0.178916000                         | -2.588964000 | C | -0.376379000 | 3.562527000  | 2.209447000  |
| C  | 3.417309000  | 1.443159000                          | -1.863149000 | N | 0.755033000  | 3.850120000  | 1.443943000  |
| N  | 4.118740000  | 0.534799000                          | -1.081687000 | C | 0.443678000  | 4.316991000  | 0.118755000  |
| C  | 4.353137000  | 1.005117000                          | 0.278517000  | C | -1.112091000 | 4.171045000  | 0.050592000  |
| C  | 3.725819000  | 2.452225000                          | 0.269087000  | N | 0.919264000  | 3.443757000  | -0.959051000 |
| N  | 3.221733000  | 2.583692000                          | -1.093199000 | C | -0.084241000 | 2.667813000  | -1.450313000 |
| N  | 2.706487000  | 2.383866000                          | 1.291810000  | N | -1.285884000 | 3.128305000  | -0.969557000 |
| C  | 2.569834000  | 1.101691000                          | 1.821292000  | C | 0.382693000  | -3.874847000 | -1.583323000 |
| N  | 3.597397000  | 0.317010000                          | 1.302387000  | C | -3.984718000 | -1.725026000 | -1.362055000 |
| C  | 4.009623000  | -0.919798000                         | 1.956250000  | C | -2.566828000 | 2.915883000  | -1.604741000 |
| N  | 3.333993000  | -2.110276000                         | 1.485129000  | O | -1.005344000 | -2.321550000 | 3.217162000  |



|   |              |              |              |    |              |                                    |              |
|---|--------------|--------------|--------------|----|--------------|------------------------------------|--------------|
| C | -3.761070000 | 1.170170000  | -1.983502000 | H  | -3.464853000 | 1.181973000                        | -3.035689000 |
| N | -3.723173000 | -0.205878000 | -1.554686000 | H  | -4.776474000 | 1.570713000                        | -1.878841000 |
| C | -2.973649000 | -1.150444000 | -2.268862000 | H  | -3.060679000 | -4.421963000                       | -1.790916000 |
| N | -3.028854000 | -2.347227000 | -1.553399000 | H  | -2.462442000 | -3.483031000                       | -3.188784000 |
| C | -3.816623000 | -2.238916000 | -0.352408000 | H  | -0.203815000 | 4.580480000                        | -2.765731000 |
| C | -4.333271000 | -0.746186000 | -0.367813000 | H  | -0.281617000 | 5.551360000                        | -1.267735000 |
| N | -3.058929000 | -2.290845000 | 0.906707000  | H  | -2.393031000 | 4.948401000                        | 0.113210000  |
| C | -3.026136000 | -1.094581000 | 1.546937000  | H  | -4.213945000 | 3.356139000                        | -0.354645000 |
| N | -3.819756000 | -0.195203000 | 0.895501000  | H  | -5.425445000 | -0.660406000                       | -0.389062000 |
| C | -2.443825000 | -3.571832000 | -2.100506000 | H  | -4.621746000 | -2.980999000                       | -0.326929000 |
| N | -1.059809000 | -3.810025000 | -1.741342000 | H  | -0.965447000 | -5.262314000                       | -0.220559000 |
| C | -0.015188000 | -3.368037000 | -2.569943000 | H  | -5.167022000 | 1.370316000                        | 1.162563000  |
| N | 1.170262000  | -3.545124000 | -1.851979000 | H  | -4.128723000 | 0.997851000                        | 2.560044000  |
| C | 0.968354000  | -4.179683000 | -0.575910000 | H  | -2.014216000 | -3.219289000                       | 2.403811000  |
| C | -0.591267000 | -4.259968000 | -0.460178000 | H  | -2.645588000 | -4.313058000                       | 1.151672000  |
| N | 1.351942000  | -3.367507000 | 0.581205000  | H  | -0.084233000 | 3.550312000                        | 2.769162000  |
| C | 0.267319000  | -2.812541000 | 1.192285000  | H  | -0.053029000 | 4.947465000                        | 1.666977000  |
| N | -0.875152000 | -3.356352000 | 0.664643000  | H  | 3.526540000  | 1.630503000                        | -3.183360000 |
| C | -0.126377000 | 3.856736000  | 1.722821000  | H  | 4.823800000  | 1.893449000                        | -1.981284000 |
| C | -4.154482000 | 1.101089000  | 1.474374000  | H  | 3.199963000  | -3.848005000                       | -2.287597000 |
| C | -2.166845000 | -3.345856000 | 1.331349000  | H  | 2.259738000  | -2.830938000                       | -3.418567000 |
| O | -1.445675000 | 2.386202000  | -3.124091000 | H  | 1.918312000  | 5.057082000                        | 0.316541000  |
| O | -2.407704000 | -0.957118000 | -3.316204000 | H  | 3.963037000  | 3.749486000                        | -0.045390000 |
| O | -0.119380000 | -2.954453000 | -3.696824000 | H  | 5.439237000  | -0.179400000                       | -0.809645000 |
| O | -1.674132000 | 1.771636000  | 2.782629000  | H  | 4.778076000  | -2.525516000                       | -0.921424000 |
| O | 1.256916000  | 1.326971000  | 2.241826000  | H  | 1.467210000  | -5.154198000                       | -0.517104000 |
| O | -2.369701000 | -0.870066000 | 2.580737000  | H  | 4.958421000  | 1.890394000                        | 1.075356000  |
| O | 0.322254000  | -1.956521000 | 2.106066000  | H  | 3.973394000  | 1.241155000                        | 2.411075000  |
| C | 2.436938000  | -3.064830000 | -2.366198000 | H  | 2.700278000  | -3.271142000                       | 2.175401000  |
| C | 4.045051000  | 1.342724000  | 1.326917000  | H  | 3.232784000  | -4.202955000                       | 0.754642000  |
| C | 2.729976000  | -3.288791000 | 1.085250000  | C  | 1.355510000  | -1.814353000                       | 5.303423000  |
| O | 1.547469000  | 2.983495000  | -3.383063000 | H  | 0.566277000  | -0.986217000                       | 4.714872000  |
| O | 1.931662000  | -0.333589000 | -3.136909000 | H  | 2.238485000  | -1.782834000                       | 4.667628000  |
| O | 3.205791000  | -0.998693000 | 2.689310000  | H  | 1.465180000  | -1.352289000                       | 6.284798000  |
| O | -0.202131000 | -0.105056000 | 4.261819000  | H  | 0.799465000  | -2.751493000                       | 5.305715000  |
| O | -0.691795000 | 0.183612000  | 0.347174000  |    |              |                                    |              |
| H | -1.393890000 | 0.649259000  | -0.157719000 |    |              | <sup>5</sup> Mn <sup>III</sup> -OH |              |
| H | 0.052475000  | 0.069098000  | -0.268305000 | Mn | 0.016311000  | -0.491103000                       | -2.563597000 |

|   |              |              |              |   |              |              |              |
|---|--------------|--------------|--------------|---|--------------|--------------|--------------|
| C | 0.309337000  | 3.526645000  | -1.868047000 | N | -3.073415000 | 2.474968000  | 1.421389000  |
| N | 1.438214000  | 3.756308000  | -1.097551000 | C | -3.672467000 | 2.422216000  | 0.112153000  |
| C | 1.134782000  | 4.256305000  | 0.239123000  | C | -4.274694000 | 0.974655000  | 0.057968000  |
| C | -0.433738000 | 4.383198000  | 0.221614000  | N | -2.712870000 | 2.427278000  | -0.992383000 |
| N | -0.783869000 | 3.934263000  | -1.121566000 | C | -2.496147000 | 1.171759000  | -1.469348000 |
| N | -0.858948000 | 3.511339000  | 1.294504000  | N | -3.439510000 | 0.319777000  | -0.958898000 |
| C | 0.214809000  | 2.891009000  | 1.936407000  | C | 3.675621000  | -1.541253000 | -1.519384000 |
| N | 1.389383000  | 3.327971000  | 1.318449000  | C | -0.341247000 | -4.321971000 | -1.334470000 |
| C | 2.685657000  | 3.122380000  | 1.954493000  | C | -3.826731000 | -0.925217000 | -1.601899000 |
| N | 3.404096000  | 1.948279000  | 1.497852000  | O | 1.538072000  | -1.939848000 | 3.240026000  |
| C | 3.462198000  | 0.790166000  | 2.275488000  | O | -1.932949000 | -1.661132000 | 3.203500000  |
| N | 4.060886000  | -0.204157000 | 1.481328000  | O | -3.052911000 | 1.179517000  | 3.354697000  |
| C | 4.375262000  | 0.266185000  | 0.158644000  | O | 1.236589000  | -2.309478000 | -2.676487000 |
| C | 4.009531000  | 1.792129000  | 0.200147000  | O | 1.802727000  | 0.577023000  | -2.279620000 |
| N | 3.084832000  | 1.948372000  | -0.925527000 | O | -1.481972000 | -2.025359000 | -2.642995000 |
| C | 2.710155000  | 0.744621000  | -1.434191000 | O | -1.580970000 | 0.864589000  | -2.263865000 |
| N | 3.495223000  | -0.241002000 | -0.900881000 | C | -2.187478000 | 3.516895000  | 1.899543000  |
| C | 4.084668000  | -1.585638000 | 1.917105000  | C | 2.708590000  | 3.241925000  | -1.514858000 |
| N | 2.957481000  | -2.406635000 | 1.455135000  | C | -2.113067000 | 3.637682000  | -1.569032000 |
| C | 1.767793000  | -2.449960000 | 2.174990000  | O | 3.102859000  | 0.669792000  | 3.419402000  |
| N | 0.834012000  | -3.204575000 | 1.401646000  | O | 0.142679000  | 2.116216000  | 2.864203000  |
| C | 1.546183000  | -3.985508000 | 0.393731000  | O | 0.286550000  | 3.072562000  | -2.999467000 |
| C | 2.931158000  | -3.254565000 | 0.288694000  | O | 0.039626000  | -0.111331000 | -4.271761000 |
| N | 0.976430000  | -3.844483000 | -0.940899000 | O | -0.018825000 | -0.743605000 | -0.362318000 |
| C | 1.635728000  | -2.863298000 | -1.638040000 | H | 0.146826000  | -1.537298000 | 0.197381000  |
| N | 2.801003000  | -2.568018000 | -1.003106000 | H | -0.049761000 | 0.017530000  | 0.243084000  |
| C | -0.344628000 | -3.753048000 | 2.102015000  | H | -0.288944000 | -3.408446000 | 3.137902000  |
| N | -1.595986000 | -3.277455000 | 1.569932000  | H | -0.311950000 | -4.848534000 | 2.072084000  |
| C | -2.254220000 | -2.195105000 | 2.170790000  | H | -5.328701000 | -1.219141000 | 1.466291000  |
| N | -3.346994000 | -1.875187000 | 1.364352000  | H | -4.320346000 | -0.884776000 | 2.903075000  |
| C | -3.455367000 | -2.740469000 | 0.215303000  | H | 4.041430000  | -1.562726000 | 3.007998000  |
| C | -2.240060000 | -3.737484000 | 0.367463000  | H | 5.013999000  | -2.066411000 | 1.596501000  |
| N | -3.171002000 | -2.101279000 | -1.077315000 | H | 3.790553000  | -3.933094000 | 0.265868000  |
| C | -1.993732000 | -2.509428000 | -1.614960000 | H | 1.628282000  | -5.041390000 | 0.673510000  |
| N | -1.467565000 | -3.522830000 | -0.866576000 | H | -2.540083000 | -4.789029000 | 0.435494000  |
| C | -4.341642000 | -0.894437000 | 1.811344000  | H | -4.429452000 | -3.239152000 | 0.173055000  |
| N | -4.100851000 | 0.472905000  | 1.393610000  | H | -5.324445000 | 0.944048000  | -0.255657000 |
| C | -3.355838000 | 1.349892000  | 2.201045000  | H | -0.462459000 | -5.343909000 | -0.965814000 |



|   |              |              |              |    |              |                                      |              |
|---|--------------|--------------|--------------|----|--------------|--------------------------------------|--------------|
| C | -2.570685000 | -3.240405000 | 1.907385000  | H  | -2.644873000 | -3.111199000                         | -2.640314000 |
| C | -4.011713000 | 1.422174000  | -1.509847000 | H  | -3.244148000 | -4.154119000                         | -1.327359000 |
| C | -2.738208000 | -3.211588000 | -1.557622000 | H  | -0.705657000 | -0.156919000                         | -4.324751000 |
| O | -1.681539000 | 2.729265000  | 3.406010000  |    |              |                                      |              |
| O | -1.883173000 | -0.541057000 | 2.698374000  |    |              | <b><sup>6</sup>Co<sup>IV</sup>=O</b> |              |
| O | -3.139797000 | -0.814256000 | -3.017745000 | Co | -0.097188000 | -0.413318000                         | -2.500858000 |
| O | 0.231858000  | 0.097555000  | -4.185868000 | C  | 1.125810000  | 3.545914000                          | -1.775414000 |
| O | 0.802943000  | 0.228598000  | -0.290343000 | N  | 2.273591000  | 3.488048000                          | -0.994027000 |
| H | 1.459288000  | 0.677101000  | 0.292156000  | C  | 2.057135000  | 3.942295000                          | 0.375781000  |
| H | 0.053029000  | -0.017390000 | 0.279547000  | C  | 0.551769000  | 4.414120000                          | 0.362389000  |
| H | 3.315295000  | 0.900038000  | 3.120074000  | N  | 0.135320000  | 4.149461000                          | -1.011252000 |
| H | 4.680298000  | 1.356408000  | 2.052960000  | N  | -0.074809000 | 3.562529000                          | 1.347023000  |
| H | 2.943197000  | -4.589906000 | 1.454811000  | C  | 0.780968000  | 2.553370000                          | 1.778584000  |
| H | 2.289504000  | -3.755185000 | 2.893024000  | N  | 2.067306000  | 2.884418000                          | 1.360197000  |
| H | 0.096189000  | 4.365939000  | 2.960261000  | C  | 3.257404000  | 2.390569000                          | 2.044513000  |
| H | 0.234299000  | 5.427205000  | 1.529664000  | N  | 3.757851000  | 1.122587000                          | 1.564474000  |
| H | 2.397863000  | 4.902335000  | 0.203805000  | C  | 3.528390000  | -0.049261000                         | 2.287701000  |
| H | 4.193903000  | 3.263117000  | 0.628265000  | N  | 3.873873000  | -1.118725000                         | 1.448014000  |
| H | 5.377623000  | -0.769395000 | 0.436965000  | C  | 4.304065000  | -0.677407000                         | 0.146061000  |
| H | 4.546278000  | -3.070974000 | 0.159470000  | C  | 4.275282000  | 0.887302000                          | 0.242828000  |
| H | 0.910441000  | -5.264182000 | -0.300225000 | N  | 3.374475000  | 1.287814000                          | -0.845050000 |
| H | 5.192661000  | 1.388049000  | -0.983151000 | C  | 2.770339000  | 0.206947000                          | -1.410713000 |
| H | 4.212728000  | 1.121822000  | -2.444632000 | N  | 3.355405000  | -0.937995000                         | -0.938139000 |
| H | 1.989826000  | -3.014589000 | -2.668195000 | C  | 3.631565000  | -2.488186000                         | 1.856820000  |
| H | 2.569796000  | -4.236179000 | -1.515196000 | N  | 2.359888000  | -3.060323000                         | 1.403599000  |
| H | 0.169334000  | 3.644165000  | -2.622687000 | C  | 1.189314000  | -2.884293000                         | 2.140061000  |
| H | 0.077182000  | 4.976869000  | -1.448935000 | N  | 0.120096000  | -3.399235000                         | 1.354503000  |
| H | -3.617669000 | 1.358366000  | 3.020831000  | C  | 0.639208000  | -4.243556000                         | 0.288569000  |
| H | -4.889466000 | 1.721638000  | 1.820091000  | C  | 2.147834000  | -3.815904000                         | 0.197375000  |
| H | -3.350116000 | -3.995453000 | 1.753787000  | N  | 0.107248000  | -3.902875000                         | -1.028463000 |
| H | -2.435880000 | -3.069957000 | 2.977927000  | C  | 0.956379000  | -3.050918000                         | -1.679322000 |
| H | -1.884325000 | 5.016720000  | -0.200640000 | N  | 2.158519000  | -3.046130000                         | -1.056725000 |
| H | -3.960258000 | 3.721862000  | 0.030012000  | C  | -1.169628000 | -3.664617000                         | 2.011851000  |
| H | -5.492763000 | -0.225328000 | 0.473034000  | N  | -2.258504000 | -2.879718000                         | 1.477052000  |
| H | -4.855102000 | -2.586143000 | 0.436386000  | C  | -2.691246000 | -1.716264000                         | 2.131927000  |
| H | -1.534427000 | -5.207372000 | -0.064939000 | N  | -3.696697000 | -1.150543000                         | 1.344970000  |
| H | -4.921368000 | 1.974759000  | -1.256035000 | C  | -3.967043000 | -1.915992000                         | 0.157131000  |
| H | -3.893303000 | 1.406445000  | -2.594617000 | C  | -3.001956000 | -3.160424000                         | 0.276689000  |

|   |              |              |              |    |              |                                      |              |
|---|--------------|--------------|--------------|----|--------------|--------------------------------------|--------------|
| N | -3.520165000 | -1.300545000 | -1.104152000 | H  | 2.844148000  | -4.657746000                         | 0.119489000  |
| C | -2.466275000 | -1.947260000 | -1.650767000 | H  | 0.496492000  | -5.309809000                         | 0.496312000  |
| N | -2.211843000 | -3.093451000 | -0.962089000 | H  | -3.526354000 | -4.121192000                         | 0.326363000  |
| C | -4.426467000 | 0.036855000  | 1.792809000  | H  | -5.025417000 | -2.185642000                         | 0.077149000  |
| N | -3.853141000 | 1.307622000  | 1.394196000  | H  | -4.951648000 | 2.105814000                          | -0.217144000 |
| C | -2.970445000 | 1.993131000  | 2.241059000  | H  | -1.603739000 | -5.076745000                         | -1.103927000 |
| N | -2.470514000 | 3.074840000  | 1.511195000  | H  | -1.287119000 | -4.069311000                         | -2.535163000 |
| C | -3.011009000 | 3.165374000  | 0.181232000  | H  | -3.658949000 | 0.000597000                          | -2.683309000 |
| C | -3.918751000 | 1.891947000  | 0.081142000  | H  | -4.985687000 | 0.116683000                          | -1.506405000 |
| N | -2.027419000 | 2.974883000  | -0.890309000 | H  | 3.056980000  | -2.097962000                         | -2.638258000 |
| C | -2.123401000 | 1.731725000  | -1.437287000 | H  | 4.184540000  | -2.763634000                         | -1.435252000 |
| N | -3.257181000 | 1.117133000  | -0.973246000 | H  | 3.027179000  | 2.231535000                          | 3.100395000  |
| C | 3.237342000  | -2.232749000 | -1.570901000 | H  | 4.029183000  | 3.163353000                          | 1.956748000  |
| C | -1.271593000 | -4.092698000 | -1.444598000 | H  | -1.540782000 | 4.912211000                          | 1.903784000  |
| C | -3.904648000 | -0.005437000 | -1.620680000 | H  | -1.268565000 | 3.586107000                          | 3.064693000  |
| O | 1.080092000  | -2.384863000 | 3.228995000  | H  | 5.285185000  | -1.088430000                         | -0.118165000 |
| O | -2.277699000 | -1.306089000 | 3.187248000  | H  | 5.254270000  | 1.357142000                          | 0.095258000  |
| O | -2.724690000 | 1.728280000  | 3.390905000  | H  | 2.764240000  | 4.736764000                          | 0.636315000  |
| O | 0.687159000  | -2.377808000 | -2.695482000 | H  | 0.420650000  | 5.472834000                          | 0.609248000  |
| O | 1.849222000  | 0.255296000  | -2.258456000 | H  | -3.548707000 | 4.106377000                          | 0.018333000  |
| O | -1.842666000 | -1.547522000 | -2.658737000 | H  | 4.318714000  | 3.100880000                          | -1.158039000 |
| O | -1.312015000 | 1.249148000  | -2.261296000 | H  | 3.276395000  | 2.568179000                          | -2.502686000 |
| C | -1.348387000 | 3.838208000  | 2.004820000  | H  | -1.187867000 | 3.957374000                          | -2.540994000 |
| C | 3.356436000  | 2.648996000  | -1.417254000 | H  | -1.761559000 | 4.999211000                          | -1.213076000 |
| C | -1.225812000 | 4.076767000  | -1.456829000 |    |              |                                      |              |
| O | 3.147165000  | -0.127685000 | 3.428681000  |    |              | <b><sup>4</sup>Co<sup>IV</sup>=O</b> |              |
| O | 0.462039000  | 1.555624000  | 2.401461000  | Co | -0.465933000 | -0.475975000                         | -2.478414000 |
| O | 1.015735000  | 3.158238000  | -2.920984000 | C  | 2.767947000  | 2.341297000                          | -1.934818000 |
| O | -0.012486000 | -0.170883000 | -4.326401000 | N  | 3.708390000  | 1.685626000                          | -1.149534000 |
| O | -0.176988000 | -0.610385000 | -0.194539000 | C  | 3.838334000  | 2.248816000                          | 0.187713000  |
| H | -0.217980000 | -1.442410000 | 0.319719000  | C  | 2.812475000  | 3.444603000                          | 0.171454000  |
| H | -0.012769000 | 0.087821000  | 0.470695000  | N  | 2.258839000  | 3.385669000                          | -1.174679000 |
| H | -1.056186000 | -3.376592000 | 3.060428000  | N  | 1.890582000  | 3.115880000                          | 1.238080000  |
| H | -1.406342000 | -4.733328000 | 1.943987000  | C  | 2.209332000  | 1.914032000                          | 1.870301000  |
| H | -5.459145000 | -0.035186000 | 1.435784000  | N  | 3.361152000  | 1.408315000                          | 1.264419000  |
| H | -4.415658000 | 0.030348000  | 2.884791000  | C  | 4.134427000  | 0.349809000                          | 1.897698000  |
| H | 3.609159000  | -2.481490000 | 2.948587000  | N  | 3.803711000  | -0.988402000                         | 1.443937000  |
| H | 4.443920000  | -3.134860000 | 1.510478000  | C  | 3.071766000  | -1.862340000                         | 2.246820000  |

|   |              |              |              |   |              |              |              |
|---|--------------|--------------|--------------|---|--------------|--------------|--------------|
| N | 2.781431000  | -2.992144000 | 1.457714000  | O | -1.314349000 | 3.069384000  | 3.333932000  |
| C | 3.273953000  | -2.856769000 | 0.113428000  | O | -0.820500000 | -2.558528000 | -2.648024000 |
| C | 4.095154000  | -1.524578000 | 0.137805000  | O | 1.608981000  | -0.778867000 | -2.262266000 |
| N | 3.532501000  | -0.757146000 | -0.974927000 | O | -2.524316000 | -0.452796000 | -2.612894000 |
| C | 2.386274000  | -1.321626000 | -1.445269000 | O | -0.453470000 | 1.650467000  | -2.255148000 |
| N | 2.243685000  | -2.574662000 | -0.894082000 | C | 0.954898000  | 4.055091000  | 1.845141000  |
| C | 1.834036000  | -3.986129000 | 1.912318000  | C | 4.202991000  | 0.412529000  | -1.573551000 |
| N | 0.443907000  | -3.771072000 | 1.477816000  | C | 1.081839000  | 4.065811000  | -1.625030000 |
| C | -0.406157000 | -2.939752000 | 2.198794000  | O | 2.771427000  | -1.705669000 | 3.403350000  |
| N | -1.616870000 | -2.815161000 | 1.442834000  | O | 1.599972000  | 1.400935000  | 2.783707000  |
| C | -1.695519000 | -3.906005000 | 0.473153000  | O | 2.466762000  | 2.065308000  | -3.077117000 |
| C | -0.201852000 | -4.367273000 | 0.336346000  | O | -0.319580000 | -0.349773000 | -4.063128000 |
| N | -2.041502000 | -3.441000000 | -0.866050000 | O | -0.609457000 | -0.526733000 | -0.408597000 |
| C | -0.900135000 | -3.214865000 | -1.589272000 | H | -0.974489000 | -1.220402000 | 0.194002000  |
| N | 0.154189000  | -3.800531000 | -0.974965000 | H | 0.017110000  | 0.008427000  | 0.109803000  |
| C | -2.822312000 | -2.363177000 | 2.172491000  | H | -2.507714000 | -2.130369000 | 3.193334000  |
| N | -3.397457000 | -1.161346000 | 1.628770000  | H | -3.564895000 | -3.169727000 | 2.187097000  |
| C | -3.104452000 | 0.085510000  | 2.203354000  | H | -4.617713000 | 2.930340000  | 1.449851000  |
| N | -3.687254000 | 1.060736000  | 1.394555000  | H | -3.665308000 | 2.490958000  | 2.896290000  |
| C | -4.375679000 | 0.497256000  | 0.262415000  | H | 1.842409000  | -3.940590000 | 3.003337000  |
| C | -4.213301000 | -1.063460000 | 0.448277000  | H | 2.141941000  | -4.983524000 | 1.584012000  |
| N | -3.723909000 | 0.719463000  | -1.040909000 | H | -0.070827000 | -5.454168000 | 0.319120000  |
| C | -3.206176000 | -0.413045000 | -1.561166000 | H | -2.372627000 | -4.702747000 | 0.798866000  |
| N | -3.545408000 | -1.487408000 | -0.795622000 | H | -5.164954000 | -1.596121000 | 0.552422000  |
| C | -3.689355000 | 2.471167000  | 1.804755000  | H | -5.417898000 | 0.828642000  | 0.210709000  |
| N | -2.551969000 | 3.250749000  | 1.364128000  | H | -3.079986000 | 4.384598000  | -0.330219000 |
| C | -1.404258000 | 3.366893000  | 2.169628000  | H | -4.119762000 | -3.488540000 | -0.833206000 |
| N | -0.409382000 | 3.934592000  | 1.371967000  | H | -3.376454000 | -2.873012000 | -2.328355000 |
| C | -0.871849000 | 4.287674000  | 0.052661000  | H | -3.127130000 | 1.830802000  | -2.656612000 |
| C | -2.313410000 | 3.680449000  | 0.013599000  | H | -4.169692000 | 2.696511000  | -1.505328000 |
| N | -0.183494000 | 3.596686000  | -1.036281000 | H | 1.370424000  | -3.436196000 | -2.583268000 |
| C | -0.900412000 | 2.527124000  | -1.485195000 | H | 2.041364000  | -4.574102000 | -1.391765000 |
| N | -2.173686000 | 2.592587000  | -0.963917000 | H | 3.926105000  | 0.356630000  | 2.970031000  |
| C | 1.485647000  | -3.639801000 | -1.517578000 | H | 5.198208000  | 0.553276000  | 1.729973000  |
| C | -3.323810000 | -2.859139000 | -1.238921000 | H | 1.329197000  | 5.070517000  | 1.670888000  |
| C | -3.332671000 | 1.998350000  | -1.598508000 | H | 0.912610000  | 3.861185000  | 2.919419000  |
| O | -0.185329000 | -2.397399000 | 3.248672000  | H | 3.858760000  | -3.730821000 | -0.195650000 |
| O | -2.480391000 | 0.260039000  | 3.219889000  | H | 5.170766000  | -1.663020000 | -0.019768000 |

|    |              |                                      |              |   |              |              |              |
|----|--------------|--------------------------------------|--------------|---|--------------|--------------|--------------|
| H  | 4.871583000  | 2.567750000                          | 0.367575000  | C | -3.176195000 | 0.303588000  | 2.151372000  |
| H  | 3.282308000  | 4.419358000                          | 0.346835000  | N | -3.625996000 | 1.358657000  | 1.352227000  |
| H  | -0.840332000 | 5.369536000                          | -0.119668000 | C | -4.322516000 | 0.904656000  | 0.178602000  |
| H  | 5.266491000  | 0.305618000                          | -1.338706000 | C | -4.320559000 | -0.669878000 | 0.317257000  |
| H  | 4.066113000  | 0.372286000                          | -2.655693000 | N | -3.599619000 | 1.101162000  | -1.091667000 |
| H  | 1.036865000  | 3.919979000                          | -2.705784000 | C | -3.158278000 | -0.057869000 | -1.615692000 |
| H  | 1.141186000  | 5.136576000                          | -1.407221000 | N | -3.653469000 | -1.108015000 | -0.918333000 |
|    |              |                                      |              | C | -3.479167000 | 2.753631000  | 1.779471000  |
|    |              | <b><sup>2</sup>Co<sup>IV</sup>=O</b> |              | N | -2.253612000 | 3.409426000  | 1.365457000  |
| Co | -0.399233000 | -0.375769000                         | -2.456437000 | C | -1.127902000 | 3.420740000  | 2.203620000  |
| C  | 3.071504000  | 2.117382000                          | -1.821017000 | N | -0.071832000 | 3.940923000  | 1.451547000  |
| N  | 3.938803000  | 1.378626000                          | -1.026818000 | C | -0.452529000 | 4.321687000  | 0.116805000  |
| C  | 4.049740000  | 1.884217000                          | 0.336661000  | C | -1.945610000 | 3.865474000  | 0.035713000  |
| C  | 3.136208000  | 3.170312000                          | 0.310844000  | N | 0.205023000  | 3.553263000  | -0.946539000 |
| N  | 2.638662000  | 3.194369000                          | -1.060656000 | C | -0.619076000 | 2.588269000  | -1.447951000 |
| N  | 2.129526000  | 2.884918000                          | 1.307449000  | N | -1.891835000 | 2.811345000  | -0.981390000 |
| C  | 2.216554000  | 1.579932000                          | 1.783621000  | C | 1.198796000  | -3.691548000 | -1.573097000 |
| N  | 3.425438000  | 1.049361000                          | 1.339569000  | C | -3.512348000 | -2.460532000 | -1.418345000 |
| C  | 4.069517000  | -0.067386000                         | 2.020629000  | C | -3.092993000 | 2.340353000  | -1.630690000 |
| N  | 3.675776000  | -1.376638000                         | 1.545830000  | O | -0.578608000 | -2.541204000 | 3.243054000  |
| C  | 2.799359000  | -2.173963000                         | 2.285717000  | O | -2.586542000 | 0.386245000  | 3.199154000  |
| N  | 2.415283000  | -3.238114000                         | 1.451841000  | O | -1.091807000 | 3.092876000  | 3.362738000  |
| C  | 3.001414000  | -3.139609000                         | 0.141106000  | O | -0.885863000 | -2.164058000 | -2.632628000 |
| C  | 3.935039000  | -1.885420000                         | 0.225380000  | O | 1.570455000  | -0.903353000 | -2.228070000 |
| N  | 3.458741000  | -1.021282000                         | -0.862915000 | O | -2.419842000 | -0.152974000 | -2.622028000 |
| C  | 2.297996000  | -1.492453000                         | -1.395174000 | O | -0.261176000 | 1.674401000  | -2.230731000 |
| N  | 2.068557000  | -2.751490000                         | -0.916525000 | C | 1.284109000  | 3.885419000  | 1.947372000  |
| C  | 1.380878000  | -4.170531000                         | 1.855468000  | C | 4.280519000  | 0.056455000  | -1.447298000 |
| N  | 0.021598000  | -3.839721000                         | 1.404053000  | C | 1.508465000  | 3.943236000  | -1.519731000 |
| C  | -0.797017000 | -2.992402000                         | 2.150091000  | O | 2.465667000  | -2.006921000 | 3.431841000  |
| N  | -1.960838000 | -2.731684000                         | 1.365090000  | O | 1.384218000  | 1.003240000  | 2.458941000  |
| C  | -2.068001000 | -3.723058000                         | 0.299754000  | O | 2.762988000  | 1.874224000  | -2.968362000 |
| C  | -0.614725000 | -4.300020000                         | 0.196705000  | O | -0.254791000 | -0.319299000 | -4.135153000 |
| N  | -2.289278000 | -3.126376000                         | -1.015684000 | O | -0.571820000 | -0.411389000 | -0.246350000 |
| C  | -1.092539000 | -2.916824000                         | -1.650354000 | H | -1.077172000 | -1.040485000 | 0.307599000  |
| N  | -0.146637000 | -3.680785000                         | -1.055300000 | H | 0.013267000  | 0.074723000  | 0.365364000  |
| C  | -3.148317000 | -2.174348000                         | 2.042073000  | H | -2.870947000 | -2.018120000 | 3.088054000  |
| N  | -3.553675000 | -0.890987000                         | 1.514918000  | H | -3.979701000 | -2.886865000 | 1.980714000  |



|   |              |              |              |    |              |                                        |              |
|---|--------------|--------------|--------------|----|--------------|----------------------------------------|--------------|
| C | 4.370144000  | -0.617815000 | 0.621528000  | H  | -4.080642000 | 3.584557000                            | -1.290068000 |
| C | 1.866262000  | 3.512178000  | 1.297729000  | H  | -3.238436000 | 2.805353000                            | -2.660600000 |
| O | 1.076279000  | -1.889769000 | -3.588892000 | H  | -1.308908000 | -5.252536000                           | 0.078563000  |
| O | 1.541785000  | 1.573069000  | -3.541399000 | H  | -3.510729000 | -4.179397000                           | 0.227170000  |
| O | -0.988351000 | 3.300565000  | -3.333202000 | H  | -5.548145000 | -0.455765000                           | 0.143339000  |
| O | 2.265260000  | -1.724757000 | 2.260164000  | H  | -5.205733000 | 1.962512000                            | 0.171130000  |
| O | -0.698893000 | -1.654991000 | 2.258163000  | H  | -2.218576000 | 4.976223000                            | 0.302391000  |
| O | 2.592460000  | 0.965399000  | 2.226632000  | H  | -4.473209000 | -2.595420000                           | 1.700494000  |
| O | -0.230729000 | 1.717834000  | 2.268156000  | H  | -3.338717000 | -1.919526000                           | 2.898916000  |
| C | -3.247360000 | 2.932186000  | -1.575636000 | H  | -2.680202000 | 2.705556000                            | 2.939015000  |
| C | -3.606984000 | -1.941391000 | 1.841169000  | H  | -3.584127000 | 3.690012000                            | 1.758499000  |
| C | -2.929711000 | 2.821584000  | 1.882836000  | C  | 3.002249000  | -0.391164000                           | 5.402254000  |
| O | -1.836455000 | -2.827792000 | -3.377522000 | H  | 3.548353000  | 0.474114000                            | 5.028168000  |
| O | -2.445572000 | 0.363119000  | -2.623493000 | H  | 1.842373000  | -0.270918000                           | 4.838620000  |
| O | -2.807818000 | 0.360753000  | 3.278236000  | H  | 3.353700000  | -1.354338000                           | 5.033852000  |
| O | 0.709123000  | -0.156553000 | 4.307453000  | H  | 2.748539000  | -0.360895000                           | 6.461628000  |
| O | 0.663824000  | -0.092699000 | 0.074068000  |    |              |                                        |              |
| H | 1.300334000  | -0.427582000 | -0.592165000 |    |              | <b><sup>5</sup>Co<sup>III</sup>-OH</b> |              |
| H | -0.161624000 | 0.078105000  | -0.411038000 | Co | -0.006176000 | -0.542765000                           | -2.569815000 |
| H | 2.899532000  | -0.405173000 | -3.689213000 | C  | 0.304967000  | 3.467276000                            | -1.829593000 |
| H | 4.435805000  | -0.700813000 | -2.815934000 | N  | 1.432176000  | 3.694223000                            | -1.069408000 |
| H | 2.068510000  | 4.958512000  | -1.802680000 | C  | 1.132340000  | 4.211299000                            | 0.263951000  |
| H | 1.335980000  | 4.068943000  | -3.168729000 | C  | -0.433665000 | 4.337570000                            | 0.248530000  |
| H | 0.166255000  | -4.233523000 | -3.239293000 | N  | -0.786548000 | 3.861804000                            | -1.087633000 |
| H | 0.623645000  | -5.307670000 | -1.886396000 | N  | -0.857310000 | 3.492437000                            | 1.340150000  |
| H | 2.865264000  | -4.538667000 | -0.819492000 | C  | 0.221348000  | 2.915439000                            | 2.017688000  |
| H | 4.373110000  | -2.682007000 | -1.406233000 | N  | 1.392570000  | 3.301339000                            | 1.355568000  |
| H | 5.058641000  | 1.456805000  | -1.227222000 | C  | 2.696650000  | 3.102813000                            | 1.981588000  |
| H | 3.999339000  | 3.626798000  | -0.771044000 | N  | 3.416500000  | 1.932164000                            | 1.520568000  |
| H | 0.197475000  | 5.390405000  | 0.186490000  | C  | 3.454862000  | 0.763759000                            | 2.284543000  |
| H | 5.328806000  | -0.724574000 | 0.106902000  | N  | 4.071029000  | -0.221313000                           | 1.494674000  |
| H | 4.541398000  | -0.616895000 | 1.698359000  | C  | 4.416527000  | 0.261198000                            | 0.182470000  |
| H | 1.909677000  | 3.273470000  | 2.361093000  | C  | 4.041499000  | 1.788397000                            | 0.229308000  |
| H | 2.200672000  | 4.543667000  | 1.150989000  | N  | 3.135430000  | 1.946120000                            | -0.909329000 |
| H | 0.924118000  | -3.725599000 | 2.312804000  | C  | 2.775996000  | 0.741261000                            | -1.438585000 |
| H | 0.870963000  | -4.999563000 | 1.071720000  | N  | 3.567238000  | -0.238591000                           | -0.901152000 |
| H | -3.881206000 | -1.759339000 | -2.699239000 | C  | 4.082746000  | -1.607718000                           | 1.915847000  |
| H | -4.910589000 | -2.299702000 | -1.341696000 | N  | 2.955601000  | -2.418145000                           | 1.436642000  |

|   |              |              |              |   |              |              |              |
|---|--------------|--------------|--------------|---|--------------|--------------|--------------|
| C | 1.773183000  | -2.494060000 | 2.168648000  | O | 3.064899000  | 0.630651000  | 3.417443000  |
| N | 0.844187000  | -3.241511000 | 1.389410000  | O | 0.155633000  | 2.214196000  | 3.000376000  |
| C | 1.546492000  | -3.981840000 | 0.349436000  | O | 0.282384000  | 3.031938000  | -2.978315000 |
| C | 2.929722000  | -3.247385000 | 0.256948000  | O | 0.084019000  | 0.551544000  | -4.167805000 |
| N | 0.969162000  | -3.796691000 | -0.977426000 | O | -0.052165000 | -0.678708000 | -0.349900000 |
| C | 1.636430000  | -2.814078000 | -1.662223000 | H | 0.126065000  | -1.453174000 | 0.225479000  |
| N | 2.803842000  | -2.539644000 | -1.024396000 | H | -0.033896000 | 0.102948000  | 0.226707000  |
| C | -0.338039000 | -3.798500000 | 2.070078000  | H | -0.283797000 | -3.480186000 | 3.114392000  |
| N | -1.586418000 | -3.302970000 | 1.545831000  | H | -0.313528000 | -4.893242000 | 2.013340000  |
| C | -2.237822000 | -2.227966000 | 2.166318000  | H | -5.314630000 | -1.242746000 | 1.508271000  |
| N | -3.330938000 | -1.888493000 | 1.367531000  | H | -4.282936000 | -0.919102000 | 2.931103000  |
| C | -3.452528000 | -2.741258000 | 0.210422000  | H | 4.028692000  | -1.597706000 | 3.006436000  |
| C | -2.234533000 | -3.736286000 | 0.336527000  | H | 5.013470000  | -2.088199000 | 1.598590000  |
| N | -3.189968000 | -2.087598000 | -1.080016000 | H | 3.790385000  | -3.924183000 | 0.222343000  |
| C | -2.015036000 | -2.478867000 | -1.634041000 | H | 1.630761000  | -5.047811000 | 0.588442000  |
| N | -1.472033000 | -3.492422000 | -0.897674000 | H | -2.530725000 | -4.790290000 | 0.382224000  |
| C | -4.323118000 | -0.917267000 | 1.839860000  | H | -4.426318000 | -3.241509000 | 0.175566000  |
| N | -4.095798000 | 0.454676000  | 1.431094000  | H | -5.369853000 | 0.952213000  | -0.171229000 |
| C | -3.335095000 | 1.324012000  | 2.229742000  | H | -0.457452000 | -5.304839000 | -1.029932000 |
| N | -3.074469000 | 2.460027000  | 1.457924000  | H | -0.369177000 | -4.264667000 | -2.471589000 |
| C | -3.695618000 | 2.417328000  | 0.157680000  | H | -3.671313000 | -0.858330000 | -2.648812000 |
| C | -4.309444000 | 0.971014000  | 0.105567000  | H | -4.963766000 | -1.068832000 | -1.444827000 |
| N | -2.759375000 | 2.421403000  | -0.965539000 | H | 3.539767000  | -1.443860000 | -2.594491000 |
| C | -2.571491000 | 1.167541000  | -1.470385000 | H | 4.746709000  | -1.877298000 | -1.360382000 |
| N | -3.514065000 | 0.324245000  | -0.943887000 | H | 2.538830000  | 2.954636000  | 3.052382000  |
| C | 3.719171000  | -1.536923000 | -1.522253000 | H | 3.301272000  | 4.002618000  | 1.819696000  |
| C | -0.343463000 | -4.275744000 | -1.381185000 | H | -2.640039000 | 4.487769000  | 1.762667000  |
| C | -3.888026000 | -0.923766000 | -1.581571000 | H | -2.081645000 | 3.333875000  | 3.010249000  |
| O | 1.550980000  | -2.013698000 | 3.249283000  | H | 5.469846000  | 0.072579000  | -0.054508000 |
| O | -1.913367000 | -1.714827000 | 3.208539000  | H | 4.901595000  | 2.457550000  | 0.113183000  |
| O | -3.002492000 | 1.141137000  | 3.373631000  | H | 1.645130000  | 5.168757000  | 0.414043000  |
| O | 1.236096000  | -2.256028000 | -2.702618000 | H | -0.789369000 | 5.366172000  | 0.381370000  |
| O | 1.890262000  | 0.568134000  | -2.293227000 | H | -4.434462000 | 3.216372000  | 0.027852000  |
| O | -1.512460000 | -1.996014000 | -2.670008000 | H | 3.494607000  | 3.958229000  | -1.227879000 |
| O | -1.694402000 | 0.859206000  | -2.295807000 | H | 2.687151000  | 3.121007000  | -2.574331000 |
| C | -2.190819000 | 3.503056000  | 1.936466000  | H | -2.086056000 | 3.498400000  | -2.620088000 |
| C | 2.725216000  | 3.225125000  | -1.488897000 | H | -2.773480000 | 4.462789000  | -1.292361000 |
| C | -2.130538000 | 3.611365000  | -1.535791000 | H | 0.166640000  | 1.506262000  | -3.854754000 |

| <sup>3</sup> Co <sup>III</sup> -OH |              |              |              |              |              |              |              |
|------------------------------------|--------------|--------------|--------------|--------------|--------------|--------------|--------------|
|                                    |              |              | N            | -4.088471000 | 0.433101000  | 1.423169000  |              |
| Co                                 | -0.002450000 | -0.544694000 | -2.558372000 | C            | -3.338805000 | 1.299926000  | 2.233931000  |
| C                                  | 0.301044000  | 3.513834000  | -1.799191000 | N            | -3.076525000 | 2.441833000  | 1.471423000  |
| N                                  | 1.427278000  | 3.722677000  | -1.035521000 | C            | -3.689703000 | 2.406797000  | 0.167548000  |
| C                                  | 1.125908000  | 4.222992000  | 0.304797000  | C            | -4.301005000 | 0.960938000  | 0.101869000  |
| C                                  | -0.441391000 | 4.346873000  | 0.289980000  | N            | -2.747729000 | 2.422272000  | -0.951439000 |
| N                                  | -0.792682000 | 3.891553000  | -1.054548000 | C            | -2.564015000 | 1.174588000  | -1.475960000 |
| N                                  | -0.863790000 | 3.482779000  | 1.365946000  | N            | -3.505302000 | 0.325693000  | -0.954146000 |
| C                                  | 0.214349000  | 2.884591000  | 2.025089000  | C            | 3.715590000  | -1.524140000 | -1.534225000 |
| N                                  | 1.386043000  | 3.299684000  | 1.383652000  | C            | -0.336499000 | -4.276537000 | -1.405773000 |
| C                                  | 2.689384000  | 3.089965000  | 2.006894000  | C            | -3.878387000 | -0.921632000 | -1.593739000 |
| N                                  | 3.405809000  | 1.923441000  | 1.532190000  | O            | 1.558633000  | -2.039689000 | 3.241331000  |
| C                                  | 3.448373000  | 0.749287000  | 2.287136000  | O            | -1.913661000 | -1.737797000 | 3.194719000  |
| N                                  | 4.057165000  | -0.229750000 | 1.485110000  | O            | -3.015238000 | 1.111523000  | 3.379501000  |
| C                                  | 4.403973000  | 0.265401000  | 0.177892000  | O            | 1.241283000  | -2.245996000 | -2.714422000 |
| C                                  | 4.025324000  | 1.790260000  | 0.237605000  | O            | 1.888605000  | 0.585810000  | -2.310329000 |
| N                                  | 3.115561000  | 1.956129000  | -0.897548000 | O            | -1.509132000 | -1.988740000 | -2.682923000 |
| C                                  | 2.767399000  | 0.755598000  | -1.446782000 | O            | -1.690302000 | 0.872968000  | -2.308410000 |
| N                                  | 3.560699000  | -0.225898000 | -0.914011000 | C            | -2.197052000 | 3.481803000  | 1.962387000  |
| C                                  | 4.085585000  | -1.617054000 | 1.902492000  | C            | 2.715535000  | 3.244665000  | -1.462931000 |
| N                                  | 2.964019000  | -2.436238000 | 1.427516000  | C            | -2.132875000 | 3.626133000  | -1.508405000 |
| C                                  | 1.780964000  | -2.514711000 | 2.158282000  | O            | 3.067408000  | 0.608494000  | 3.422158000  |
| N                                  | 0.852329000  | -3.257063000 | 1.374692000  | O            | 0.147114000  | 2.145950000  | 2.980413000  |
| C                                  | 1.553311000  | -3.988809000 | 0.328097000  | O            | 0.280799000  | 3.105042000  | -2.958159000 |
| C                                  | 2.935621000  | -3.251513000 | 0.238945000  | O            | 0.094388000  | 0.700955000  | -4.197693000 |
| N                                  | 0.974104000  | -3.795496000 | -0.996824000 | O            | -0.042513000 | -0.664063000 | -0.312438000 |
| C                                  | 1.639726000  | -2.807852000 | -1.675312000 | H            | 0.133005000  | -1.444654000 | 0.254452000  |
| N                                  | 2.804577000  | -2.530775000 | -1.034921000 | H            | -0.061636000 | 0.104582000  | 0.281539000  |
| C                                  | -0.333132000 | -3.814329000 | 2.048330000  | H            | -0.281716000 | -3.500480000 | 3.094168000  |
| N                                  | -1.578853000 | -3.313581000 | 1.521651000  | H            | -0.311055000 | -4.908946000 | 1.987197000  |
| C                                  | -2.236773000 | -2.247535000 | 2.150340000  | H            | -5.315677000 | -1.259365000 | 1.488727000  |
| N                                  | -3.334602000 | -1.912231000 | 1.356443000  | H            | -4.290387000 | -0.944175000 | 2.917985000  |
| C                                  | -3.449341000 | -2.753300000 | 0.191049000  | H            | 4.037600000  | -1.610518000 | 2.993400000  |
| C                                  | -2.229089000 | -3.746640000 | 0.313010000  | H            | 5.019149000  | -2.087682000 | 1.578768000  |
| N                                  | -3.182625000 | -2.087204000 | -1.092323000 | H            | 3.796826000  | -3.927042000 | 0.194181000  |
| C                                  | -2.010084000 | -2.479193000 | -1.649967000 | H            | 1.639697000  | -5.056349000 | 0.559376000  |
| N                                  | -1.469502000 | -3.499920000 | -0.921921000 | H            | -2.523674000 | -4.801127000 | 0.358166000  |
| C                                  | -4.324606000 | -0.938991000 | 1.826544000  | H            | -4.421638000 | -3.255731000 | 0.147306000  |



|   |              |              |              |    |              |              |              |
|---|--------------|--------------|--------------|----|--------------|--------------|--------------|
| O | -2.090346000 | 1.105968000  | -2.621939000 | H  | 4.504884000  | -2.835536000 | -1.179267000 |
| O | 0.705069000  | 1.468939000  | -2.093866000 | H  | 3.638055000  | -2.055297000 | -2.525420000 |
| C | 3.063707000  | 2.695063000  | 1.981985000  | H  | 3.226643000  | 2.579360000  | -2.560544000 |
| C | 3.739017000  | -2.098886000 | -1.439580000 | H  | 3.956921000  | 3.519441000  | -1.236073000 |
| C | 3.322875000  | 2.660772000  | -1.476450000 | H  | 0.723116000  | 0.044817000  | -4.175498000 |
| O | 1.090934000  | -2.991640000 | 3.413707000  |    |              |              |              |
| O | 1.650504000  | 0.159368000  | 2.404354000  |    |              |              |              |
| O | 3.385146000  | 0.255346000  | -2.959014000 | Co | -0.047625000 | -0.471225000 | 2.418127000  |
| O | -0.249284000 | -0.037518000 | -4.099986000 | C  | -0.457122000 | 3.493602000  | 1.686920000  |
| O | -0.811434000 | -0.042365000 | -0.174571000 | N  | -1.554196000 | 3.685163000  | 0.866506000  |
| H | -1.554004000 | -0.395835000 | 0.363675000  | C  | -1.205178000 | 4.183995000  | -0.460030000 |
| H | -0.051613000 | 0.036161000  | 0.434801000  | C  | 0.354556000  | 4.354459000  | -0.373339000 |
| H | -3.520268000 | -0.305011000 | 3.055672000  | N  | 0.656856000  | 3.915341000  | 0.985971000  |
| H | -4.914930000 | -0.496185000 | 1.947528000  | N  | 0.851647000  | 3.500320000  | -1.427615000 |
| H | -2.084634000 | 5.030693000  | 1.427658000  | C  | -0.176117000 | 2.867199000  | -2.131205000 |
| H | -1.622517000 | 4.090415000  | 2.874795000  | N  | -1.388144000 | 3.245660000  | -1.544931000 |
| H | -0.929015000 | -4.292250000 | 2.918486000  | C  | -2.650462000 | 3.010539000  | -2.239842000 |
| H | -1.221732000 | -5.299260000 | 1.472113000  | N  | -3.370144000 | 1.829155000  | -1.807685000 |
| H | -3.236949000 | -4.396172000 | 0.106250000  | C  | -3.340907000 | 0.652204000  | -2.558848000 |
| H | -4.734667000 | -2.469919000 | 0.496819000  | N  | -3.966212000 | -0.341191000 | -1.786755000 |
| H | -5.161160000 | 1.718184000  | 0.326950000  | C  | -4.376120000 | 0.143047000  | -0.493848000 |
| H | -3.919778000 | 3.835906000  | 0.087728000  | C  | -4.037698000 | 1.678246000  | -0.539309000 |
| H | 0.062733000  | 5.307308000  | -0.290978000 | N  | -3.177545000 | 1.868023000  | 0.629408000  |
| H | -5.323828000 | -0.427466000 | -1.108077000 | C  | -2.811296000 | 0.676699000  | 1.183160000  |
| H | -4.268687000 | -0.335344000 | -2.538077000 | N  | -3.559836000 | -0.326095000 | 0.626992000  |
| H | -1.352091000 | 3.304084000  | -2.684082000 | C  | -3.913091000 | -1.732715000 | -2.187273000 |
| H | -1.701702000 | 4.614507000  | -1.535194000 | N  | -2.787101000 | -2.500069000 | -1.640768000 |
| H | -0.760955000 | -3.503319000 | -2.655618000 | C  | -1.573144000 | -2.559467000 | -2.318670000 |
| H | -0.908699000 | -4.846735000 | -1.499208000 | N  | -0.661883000 | -3.273591000 | -1.487087000 |
| H | 3.222690000  | -1.961967000 | 3.073880000  | C  | -1.396390000 | -4.021339000 | -0.472210000 |
| H | 4.459921000  | -2.543686000 | 1.928615000  | C  | -2.799411000 | -3.322348000 | -0.454216000 |
| H | 3.982578000  | 3.282636000  | 1.876308000  | N  | -0.890363000 | -3.815870000 | 0.878368000  |
| H | 2.865072000  | 2.527050000  | 3.042965000  | C  | -1.619709000 | -2.852278000 | 1.536262000  |
| H | 0.956928000  | -5.237255000 | -0.221727000 | N  | -2.759102000 | -2.610376000 | 0.826726000  |
| H | 3.228343000  | -4.344500000 | 0.050954000  | C  | 0.558914000  | -3.814973000 | -2.111424000 |
| H | 5.451778000  | -0.771155000 | 0.626254000  | N  | 1.774590000  | -3.289685000 | -1.541821000 |
| H | 5.248759000  | 1.675125000  | 0.595816000  | C  | 2.419503000  | -2.196711000 | -2.136773000 |
| H | 2.452598000  | 4.818406000  | -0.021593000 | N  | 3.465333000  | -1.821651000 | -1.292387000 |

<sup>4</sup>Co<sup>II</sup>-OH(CH<sub>3</sub>)

|   |              |              |              |    |              |              |                                                     |
|---|--------------|--------------|--------------|----|--------------|--------------|-----------------------------------------------------|
| C | 3.553250000  | -2.657656000 | -0.120197000 | H  | -3.805718000 | -1.734819000 | -3.273971000                                        |
| C | 2.375373000  | -3.694723000 | -0.297711000 | H  | -4.843146000 | -2.238184000 | -1.908952000                                        |
| N | 3.201132000  | -1.999017000 | 1.145336000  | H  | -3.642549000 | -4.022112000 | -0.463701000                                        |
| C | 2.009971000  | -2.423280000 | 1.638422000  | H  | -1.443133000 | -5.090440000 | -0.708469000                                        |
| N | 1.546758000  | -3.468980000 | 0.895714000  | H  | 2.708519000  | -4.738240000 | -0.322436000                                        |
| C | 4.448457000  | -0.822885000 | -1.722675000 | H  | 4.539485000  | -3.125410000 | -0.029038000                                        |
| N | 4.161078000  | 0.545199000  | -1.338106000 | H  | 5.330030000  | 1.080742000  | 0.330311000                                         |
| C | 3.425170000  | 1.389963000  | -2.185208000 | H  | 0.559451000  | -5.297922000 | 0.998084000                                         |
| N | 3.097508000  | 2.525854000  | -1.439123000 | H  | 0.393127000  | -4.249566000 | 2.427331000                                         |
| C | 3.651286000  | 2.510230000  | -0.108464000 | H  | 3.538981000  | -0.737608000 | 2.724324000                                         |
| C | 4.287257000  | 1.077306000  | -0.007827000 | H  | 4.909908000  | -0.910146000 | 1.603704000                                         |
| N | 2.659351000  | 2.509470000  | 0.965383000  | H  | -3.589722000 | -1.507790000 | 2.337571000                                         |
| C | 2.463448000  | 1.257997000  | 1.469116000  | H  | -4.728260000 | -1.980023000 | 1.053217000                                         |
| N | 3.444756000  | 0.423805000  | 1.000177000  | H  | -2.432399000 | 2.855514000  | -3.298975000                                        |
| C | -3.715220000 | -1.620296000 | 1.259814000  | H  | -3.281894000 | 3.898494000  | -2.120310000                                        |
| C | 0.411218000  | -4.268914000 | 1.336937000  | H  | 2.622400000  | 4.537431000  | -1.787247000                                        |
| C | 3.822954000  | -0.805176000 | 1.673128000  | H  | 2.150831000  | 3.354223000  | -3.042849000                                        |
| O | -1.313650000 | -2.089440000 | -3.395800000 | H  | -5.433296000 | -0.070490000 | -0.298427000                                        |
| O | 2.126486000  | -1.696273000 | -3.194655000 | H  | -4.917645000 | 2.326790000  | -0.459839000                                        |
| O | 3.160650000  | 1.190403000  | -3.344000000 | H  | -1.735244000 | 5.123469000  | -0.656809000                                        |
| O | -1.304354000 | -2.288199000 | 2.596551000  | H  | 0.688053000  | 5.389596000  | -0.513129000                                        |
| O | -1.958563000 | 0.527722000  | 2.076212000  | H  | 4.367425000  | 3.324886000  | 0.049123000                                         |
| O | 1.433100000  | -1.940807000 | 2.633144000  | H  | -3.630915000 | 3.863556000  | 0.925234000                                         |
| O | 1.547896000  | 0.946062000  | 2.252521000  | H  | -2.850027000 | 3.061958000  | 2.309730000                                         |
| C | 2.207747000  | 3.538810000  | -1.967600000 | H  | 1.893915000  | 3.593081000  | 2.574974000                                         |
| C | -2.843491000 | 3.164261000  | 1.223537000  | H  | 2.622756000  | 4.554165000  | 1.266104000                                         |
| C | 1.982729000  | 3.695700000  | 1.492352000  | H  | -0.218222000 | 1.405556000  | 4.003206000                                         |
| O | -2.897071000 | 0.518339000  | -3.671754000 | C  | -1.258429000 | 0.195708000  | 5.218460000                                         |
| O | -0.042960000 | 2.129491000  | -3.080911000 | H  | -1.071330000 | 0.794722000  | 6.112713000                                         |
| O | -0.477816000 | 3.065125000  | 2.833600000  | H  | -2.242198000 | 0.427200000  | 4.800719000                                         |
| O | -0.220233000 | 0.453522000  | 4.246512000  | H  | -1.196478000 | -0.863352000 | 5.468430000                                         |
| O | 0.072507000  | -0.720909000 | 0.193335000  |    |              |              |                                                     |
| H | -0.058173000 | -1.521535000 | -0.359744000 |    |              |              |                                                     |
|   |              |              |              |    |              |              | <sup>2</sup> Co <sup>II</sup> -OH(CH <sub>3</sub> ) |
| H | 0.084063000  | 0.032747000  | -0.419856000 | Co | -0.260512000 | -0.529846000 | 2.298503000                                         |
| H | 0.541942000  | -3.509386000 | -3.160735000 | C  | 0.619196000  | 3.441316000  | 1.821747000                                         |
| H | 0.553199000  | -4.909256000 | -2.042550000 | N  | -0.372700000 | 3.964124000  | 1.007429000                                         |
| H | 5.431590000  | -1.115599000 | -1.339420000 | C  | 0.113214000  | 4.388921000  | -0.300725000                                        |
| H | 4.462952000  | -0.832944000 | -2.814514000 | C  | 1.653775000  | 4.087698000  | -0.218599000                                        |

|   |              |              |              |   |              |              |              |
|---|--------------|--------------|--------------|---|--------------|--------------|--------------|
| N | 1.811963000  | 3.549846000  | 1.128299000  | C | 2.691827000  | 0.454401000  | 1.483081000  |
| N | 1.877147000  | 3.148084000  | -1.296075000 | N | 3.383686000  | -0.627112000 | 0.993391000  |
| C | 0.712055000  | 2.876564000  | -2.016614000 | C | -4.021060000 | -0.477686000 | 1.226349000  |
| N | -0.332548000 | 3.588443000  | -1.418892000 | C | -0.895772000 | -4.239864000 | 1.184873000  |
| C | -1.606680000 | 3.751928000  | -2.108033000 | C | 3.373096000  | -1.924930000 | 1.641887000  |
| N | -2.636243000 | 2.813287000  | -1.704576000 | O | -1.842674000 | -1.442900000 | -3.437053000 |
| C | -2.975264000 | 1.722693000  | -2.507488000 | O | 1.555527000  | -2.121869000 | -3.251738000 |
| N | -3.870557000 | 0.932246000  | -1.764924000 | O | 3.413831000  | 0.324335000  | -3.306377000 |
| C | -4.103821000 | 1.460755000  | -0.446817000 | O | -1.967870000 | -1.905573000 | 2.517699000  |
| C | -3.327506000 | 2.825502000  | -0.440252000 | O | -1.681158000 | 1.029438000  | 2.121547000  |
| N | -2.459087000 | 2.711749000  | 0.732667000  | O | 0.761132000  | -2.337402000 | 2.571342000  |
| C | -2.454024000 | 1.445963000  | 1.234881000  | O | 1.695839000  | 0.412390000  | 2.224274000  |
| N | -3.452408000 | 0.720096000  | 0.637551000  | C | 3.185981000  | 2.802368000  | -1.845915000 |
| C | -4.242256000 | -0.392052000 | -2.219362000 | C | -1.754782000 | 3.834715000  | 1.362421000  |
| N | -3.404338000 | -1.486966000 | -1.711932000 | C | 3.006382000  | 2.917928000  | 1.614076000  |
| C | -2.248096000 | -1.865153000 | -2.385874000 | O | -2.603087000 | 1.512187000  | -3.634416000 |
| N | -1.593855000 | -2.848187000 | -1.582153000 | O | 0.620885000  | 2.160226000  | -2.987839000 |
| C | -2.538860000 | -3.401267000 | -0.614783000 | O | 0.467890000  | 3.001152000  | 2.951464000  |
| C | -3.674171000 | -2.319293000 | -0.563657000 | O | -0.097403000 | 0.063656000  | 4.184624000  |
| N | -2.018618000 | -3.424479000 | 0.746097000  | O | -0.187103000 | -0.777569000 | 0.204286000  |
| C | -2.432596000 | -2.313278000 | 1.441551000  | H | -0.565919000 | -1.478048000 | -0.375995000 |
| N | -3.437862000 | -1.707773000 | 0.748332000  | H | 0.027680000  | -0.021265000 | -0.366928000 |
| C | -0.583672000 | -3.703157000 | -2.239527000 | H | -0.500159000 | -3.359691000 | -3.273856000 |
| N | 0.726690000  | -3.589791000 | -1.654407000 | H | -0.919443000 | -4.746659000 | -2.219484000 |
| C | 1.674992000  | -2.718516000 | -2.209991000 | H | 4.861493000  | -2.623248000 | -1.375842000 |
| N | 2.773007000  | -2.697025000 | -1.350405000 | H | 4.039815000  | -2.015492000 | -2.842045000 |
| C | 2.593765000  | -3.561672000 | -0.208215000 | H | -4.137251000 | -0.382908000 | -3.306255000 |
| C | 1.163846000  | -4.195424000 | -0.423455000 | H | -5.282445000 | -0.603041000 | -1.952500000 |
| N | 2.437276000  | -2.873092000 | 1.078898000  | H | -4.685881000 | -2.737553000 | -0.603462000 |
| C | 1.169230000  | -2.939921000 | 1.559573000  | H | -2.893971000 | -4.393809000 | -0.913131000 |
| N | 0.422168000  | -3.773343000 | 0.774440000  | H | 1.172615000  | -5.289472000 | -0.484193000 |
| C | 4.018931000  | -2.032597000 | -1.750432000 | H | 3.395709000  | -4.304137000 | -0.134238000 |
| N | 4.161211000  | -0.654375000 | -1.325079000 | H | 5.397169000  | -0.556073000 | 0.377797000  |
| C | 3.716576000  | 0.398766000  | -2.141916000 | H | -1.038067000 | -5.256106000 | 0.807435000  |
| N | 3.736523000  | 1.555524000  | -1.357809000 | H | -0.921189000 | -4.255270000 | 2.275158000  |
| C | 4.245723000  | 1.331165000  | -0.026748000 | H | 3.100581000  | -1.799307000 | 2.690738000  |
| C | 4.411433000  | -0.229486000 | 0.026574000  | H | 4.382425000  | -2.343501000 | 1.582152000  |
| N | 3.289282000  | 1.600149000  | 1.043036000  | H | -3.868564000 | -0.454491000 | 2.306099000  |

|   |              |              |              |
|---|--------------|--------------|--------------|
| H | -5.095502000 | -0.479424000 | 1.017210000  |
| H | -1.444587000 | 3.575112000  | -3.173800000 |
| H | -1.955063000 | 4.779844000  | -1.954526000 |
| H | 3.875828000  | 3.628156000  | -1.636375000 |
| H | 3.079628000  | 2.678855000  | -2.926147000 |
| H | -5.174459000 | 1.560962000  | -0.233889000 |
| H | -3.975529000 | 3.703156000  | -0.334826000 |
| H | -0.114802000 | 5.449716000  | -0.459206000 |
| H | 2.278252000  | 4.980758000  | -0.339915000 |
| H | 5.175012000  | 1.882575000  | 0.156360000  |
| H | -2.306472000 | 4.741320000  | 1.094321000  |
| H | -1.789404000 | 3.701275000  | 2.444737000  |
| H | 2.886952000  | 2.811353000  | 2.693463000  |
| H | 3.879203000  | 3.546191000  | 1.411462000  |
| H | 0.145305000  | 1.009296000  | 4.088737000  |
| C | -1.173401000 | -0.078760000 | 5.144009000  |
| H | -0.831070000 | 0.301341000  | 6.109204000  |
| H | -2.063187000 | 0.460529000  | 4.809070000  |
| H | -1.380848000 | -1.145257000 | 5.217656000  |

\*\*\*
